# Supplementary material for: Superior bifunctional cobalt/nitrogen-codoped carbon nanosheet arrays on copper foam enable stable energy-saving hydrogen production accompanied with glucose upgrading
Source: Royal Society of Chemistry journal article supplement (doi:10.1039/d2gc02426h), 2022-01-01
Supplement: d2gc02426h1.pdf [file d2gc02426h1.pdf]

## Electronic Supporting Information

### **Superior bifunctional cobalt/nitrogen-codoped carbon nanosheet arrays on copper foam enable stable energy-saving hydrogen production accompanied with glucose upgrading**

*Yu Xin,<sup>ab</sup> Fengliang Wang,<sup>ab</sup> Liyu Chen,<sup>ab</sup> Yingwei Li\*<sup>ab</sup> and Kui Shen\*<sup>ab</sup>*

*<sup>a</sup> State Key Laboratory of Pulp and Paper Engineering, School of Chemistry and Chemical Engineering, South China University of Technology, Guangzhou 510640, China.*

*<sup>b</sup> Key Laboratory of Fuel Cell Technology of Guangdong Province, School of Chemistry and Chemical Engineering, South China University of Technology, Guangzhou 510640, China*

\* Corresponding authors: Y. Li and K. Shen, E-mail: liyw@scut.edu.cn; cekshen@scut.edu.cn

This file includes supplementary Figures S1-S36, and Table S1-S4.

Supplementary Figures

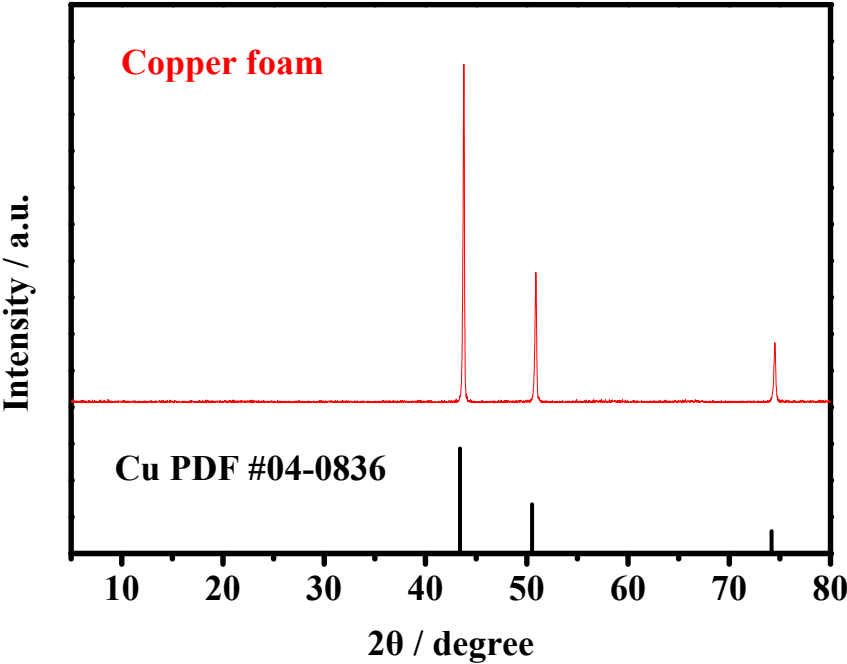

Figure S1. The XRD pattern of copper foam (CF) and the standard line of Cu.

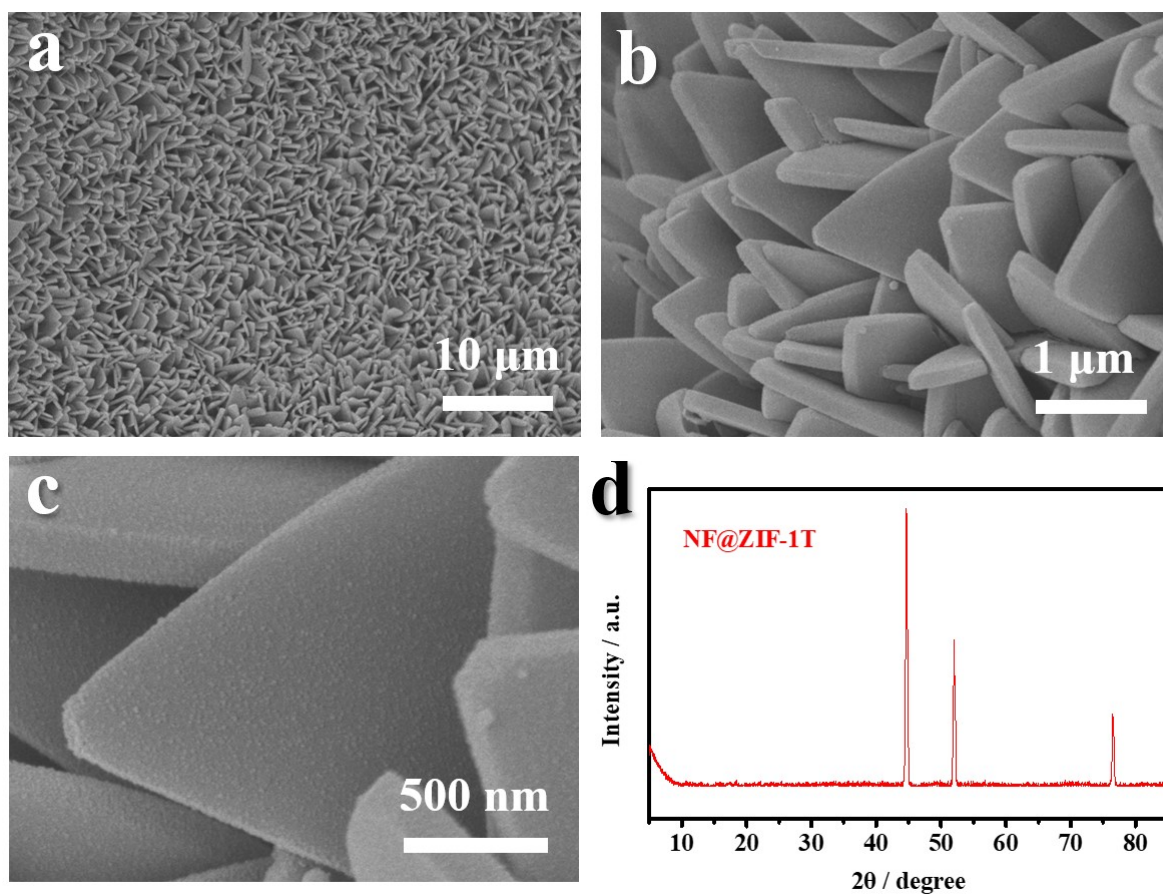

**Figure S2. Characterization of NF@ZIF-1T.** a-c) Low- and high-magnification SEM images, and d) XRD pattern.

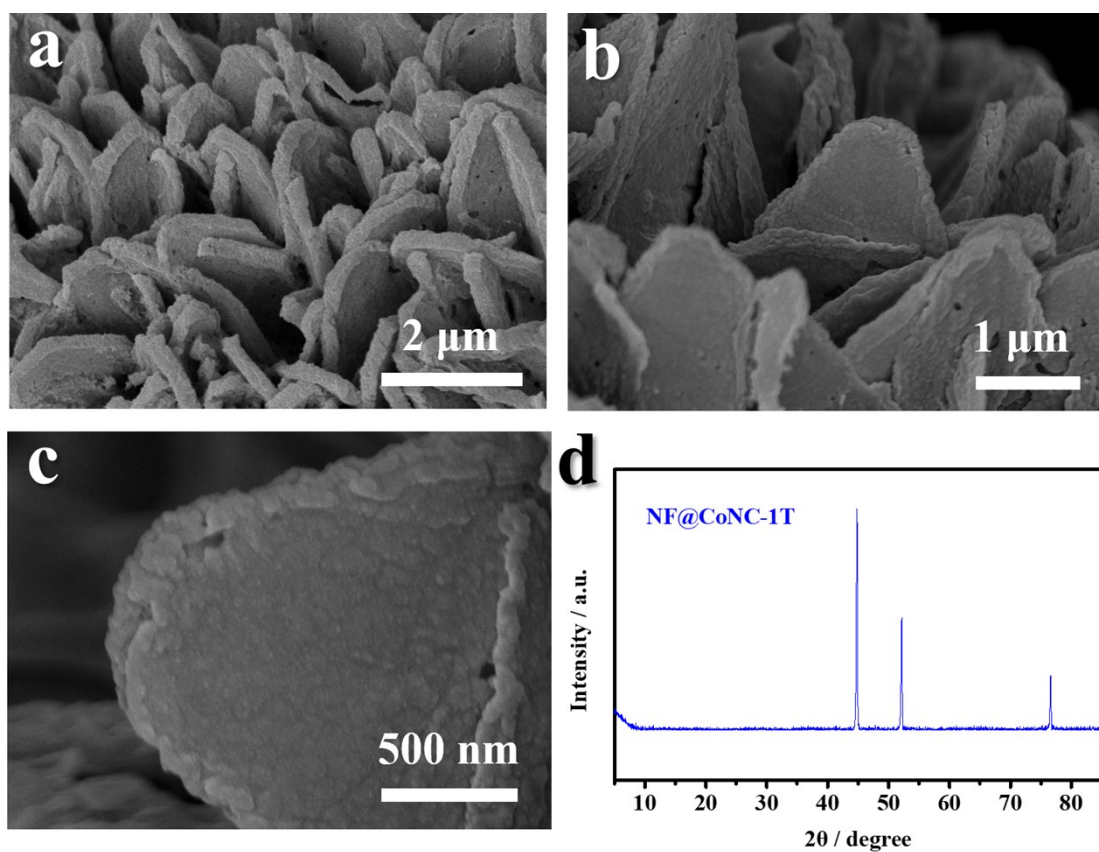

**Figure S3. Characterization of NF@CoNC-1T.** a-c) Low- and high-magnification SEM images, and d) XRD pattern.

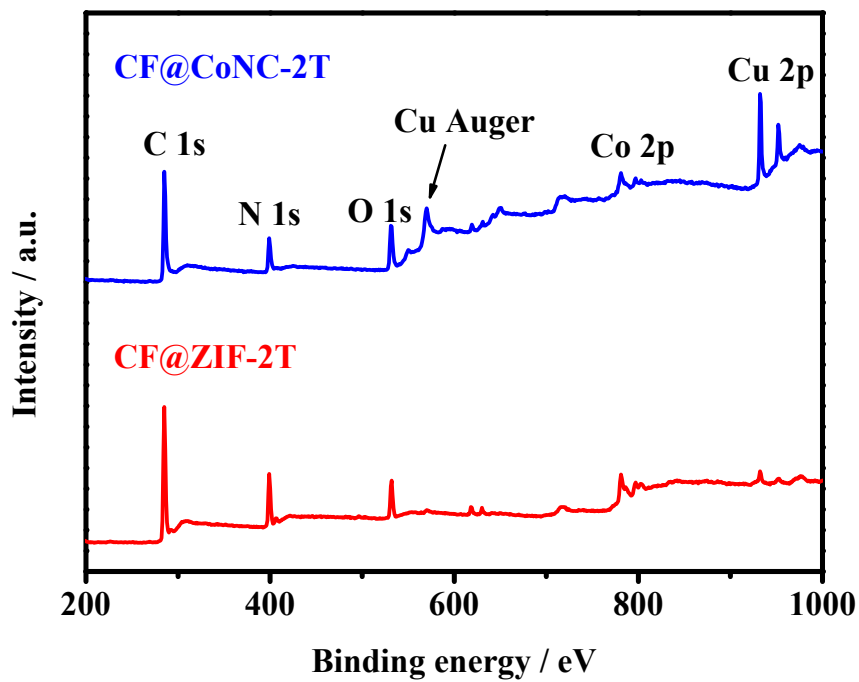

**Figure S4.** The full XPS survey spectra of CF@ZIF-2T and CF@CoNC-2T.

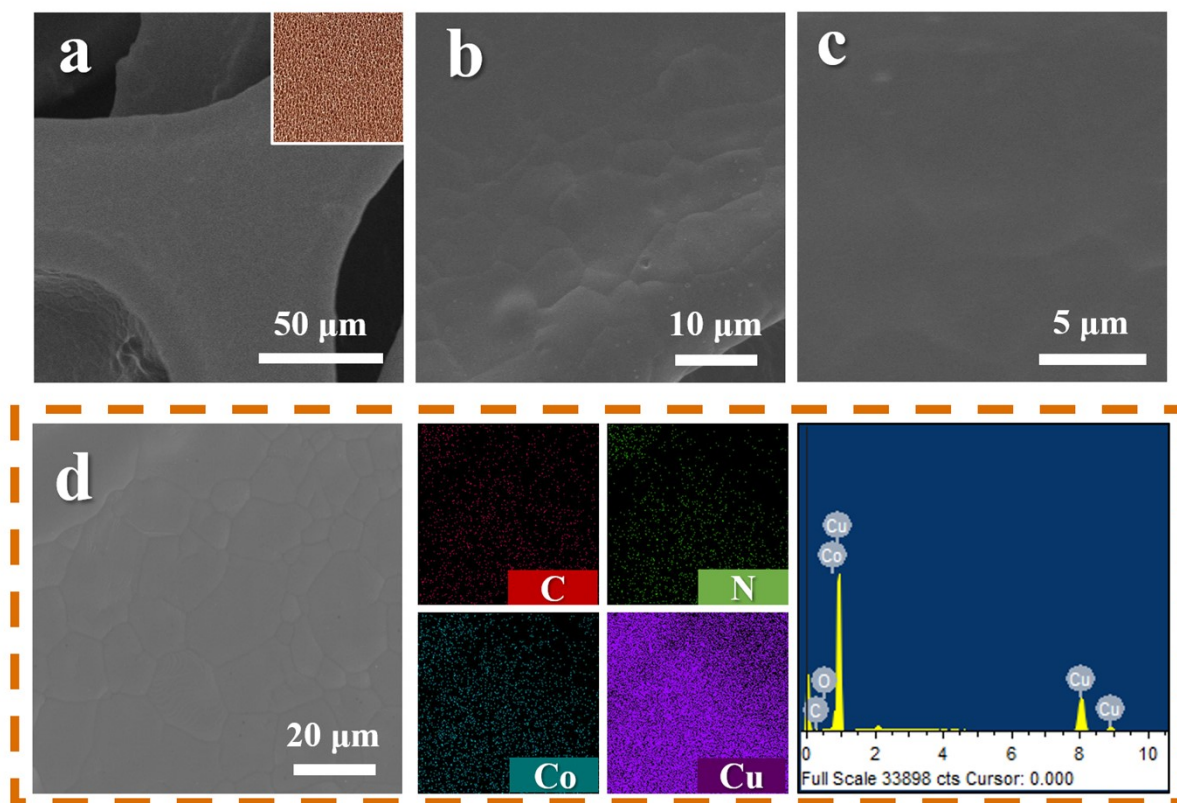

**Figure S5. Characterization of copper foam (CF).** (a-c) Low- and high-magnification SEM images of CF after spraying a conductive Au coating. (d) SEM image of CF without a conductive coating and its corresponding EDS mapping images and element spectrum. The inset in (a) is the optical photograph of CF.

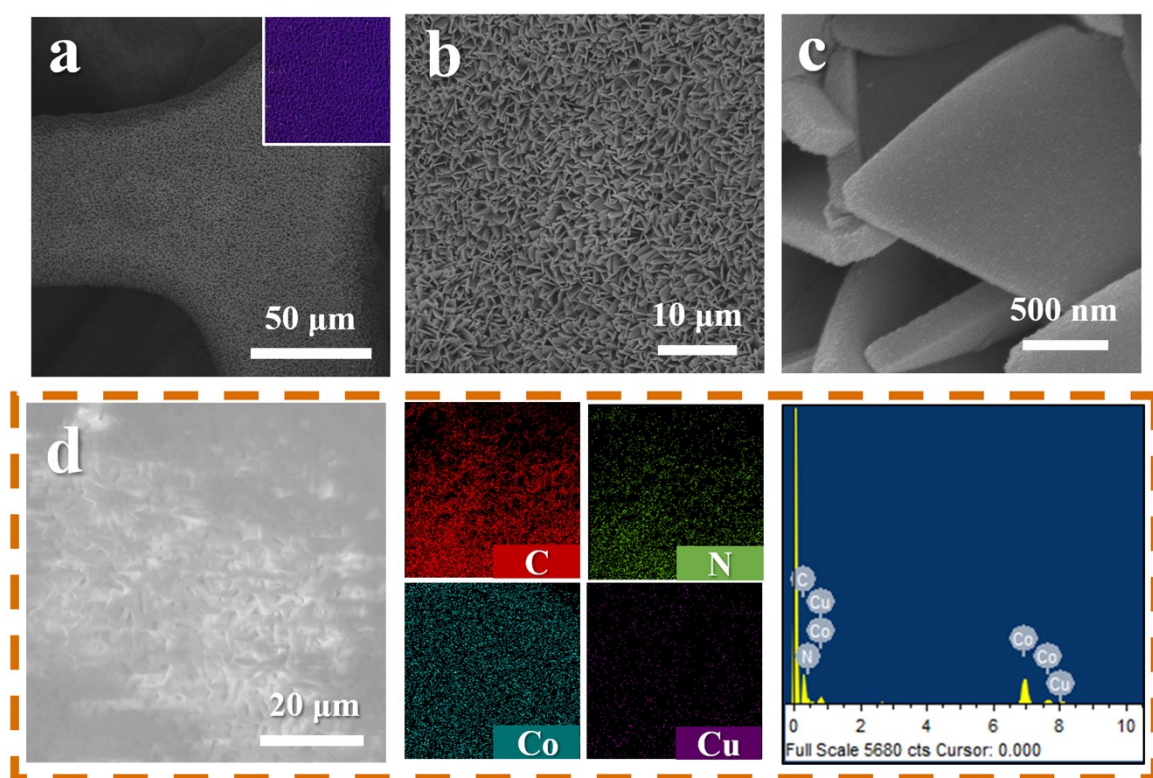

**Figure S6. Characterization of CF@ZIF-1T.** (a-c) Low- and high-magnification SEM images of CF@ZIF-1T after spraying a conductive Au coating. (d) SEM image of CF@ZIF-1T without a conductive coating and its corresponding EDS mapping images and element spectrum. The inset in (a) is the optical photograph of CF@ZIF-1T.

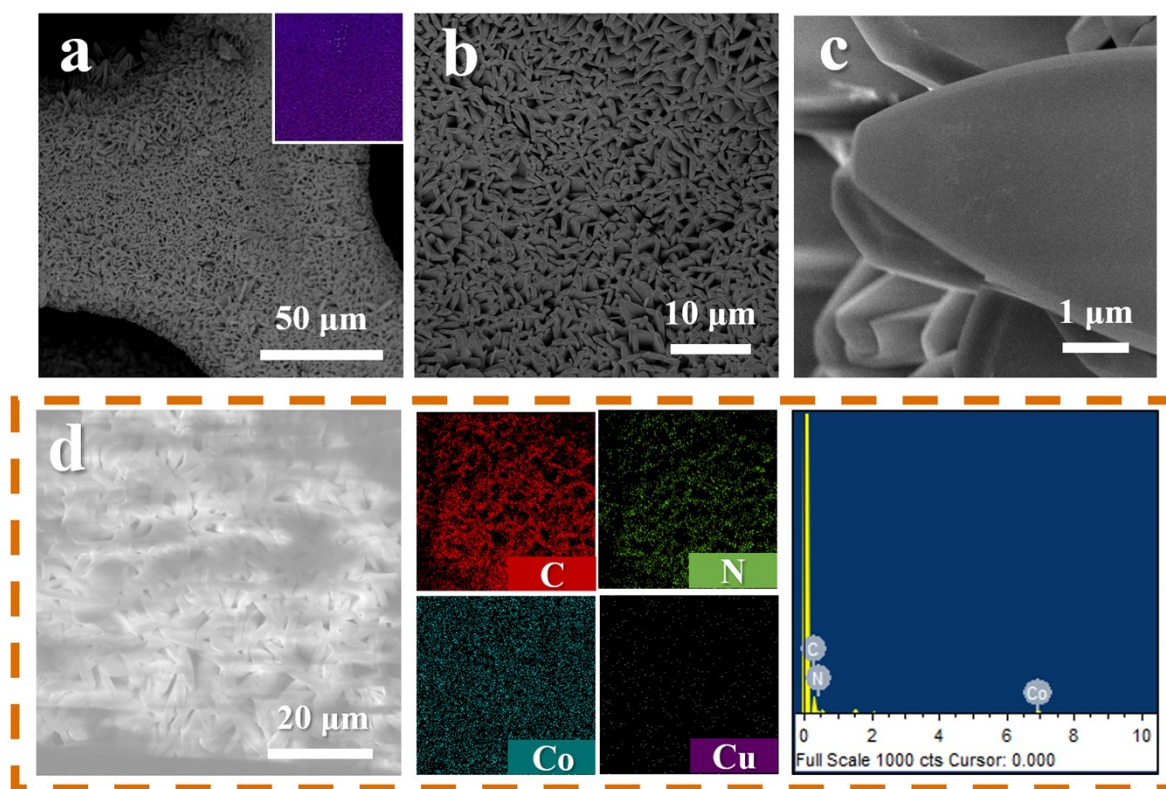

**Figure S7. Characterization of CF@ZIF-2T.** (a-c) Low- and high-magnification SEM images of CF@ZIF-2T after spraying a conductive Au coating. (d) SEM image of CF@ZIF-2T without a conductive coating and its corresponding EDS mapping images and element spectrum. The inset in (a) is the optical photograph of CF@ZIF-2T.



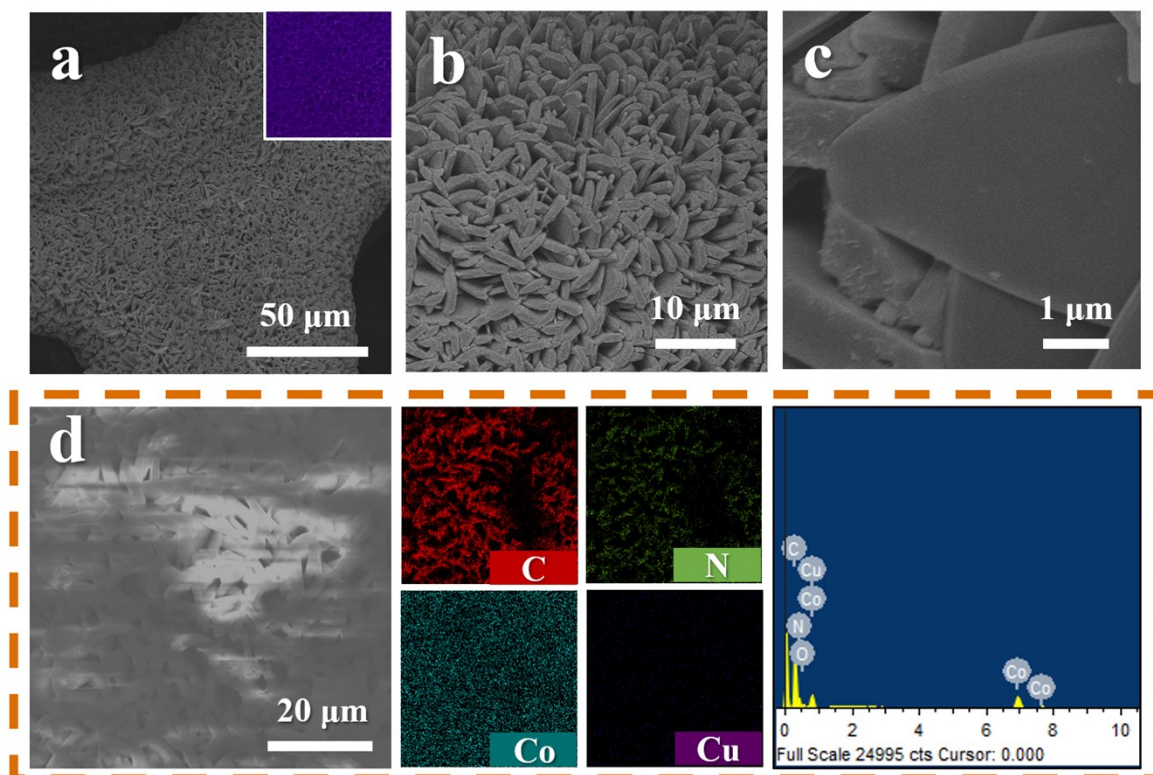

**Figure S8. Characterization of CF@ZIF-3T.** (a-c) Low- and high-magnification SEM images of CF@ZIF-3T after spraying a conductive Au coating. (d) SEM image of CF@ZIF-3T without a conductive coating and its corresponding EDS mapping images and element spectrum. The inset in (a) is the optical photograph of CF@ZIF-3T.

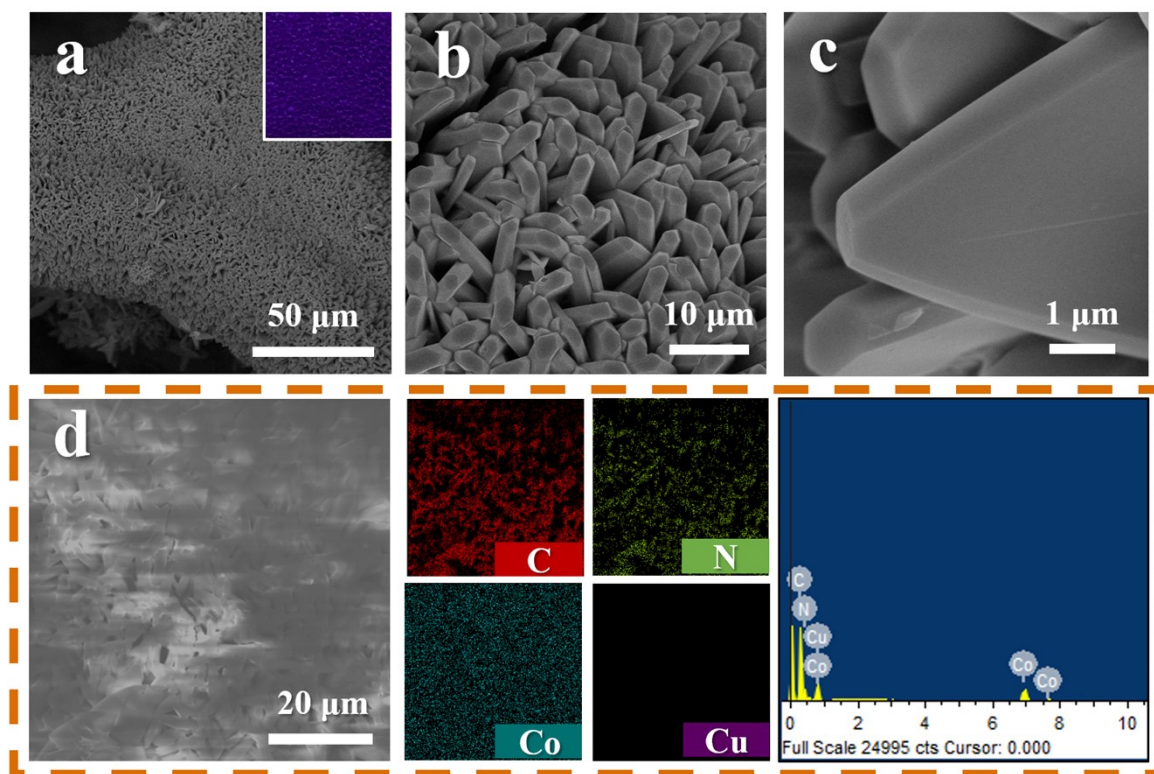

**Figure S9. Characterization of CF@ZIF-4T.** (a-c) Low- and high-magnification SEM images of CF@ZIF-4T after spraying a conductive Au coating. (d) SEM image of CF@ZIF-4T without a conductive coating and its corresponding EDS mapping images and element spectrum. The inset in (a) is the optical photograph of CF@ZIF-4T.

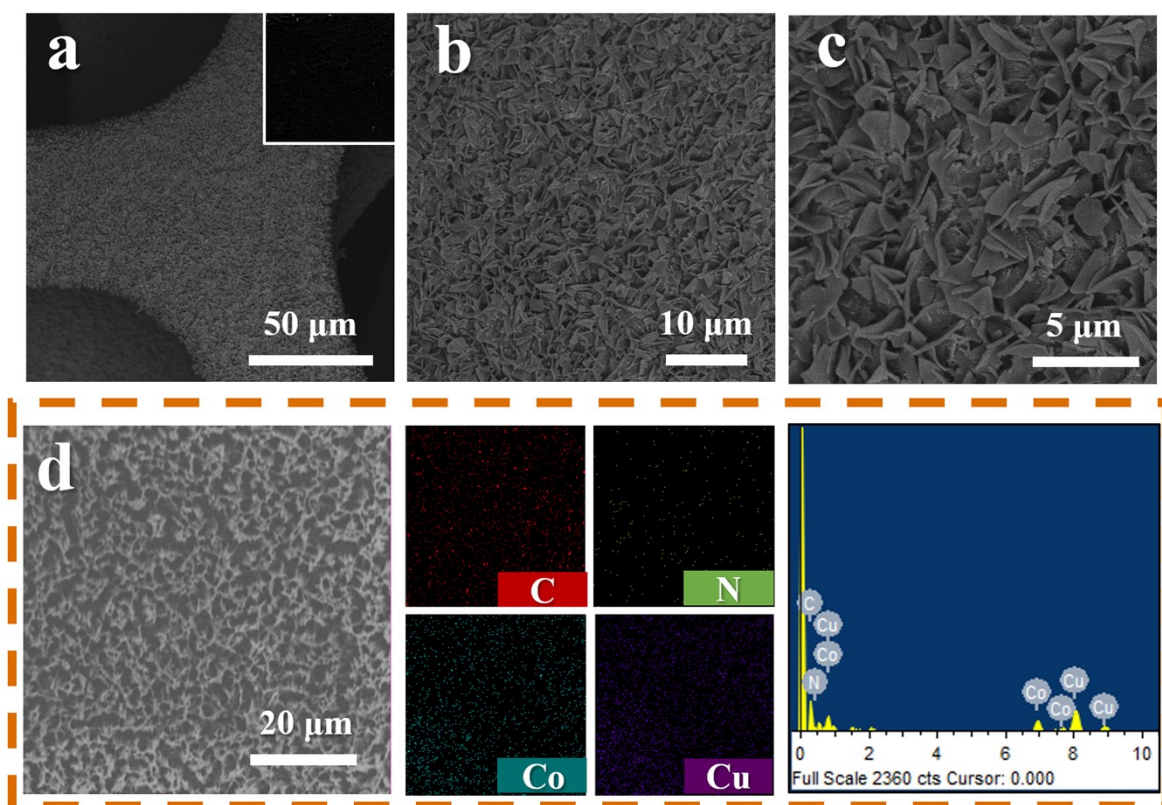

**Figure S10. Characterization of CF@CoNC-1T.** (a-c) Low- and high-magnification SEM images of CF@CoNC-1T after spraying a conductive Au coating. (d) SEM image of CF@CoNC-1T without a conductive coating and its corresponding EDS mapping images and element spectrum. The inset in (a) is the optical photograph of CF@CoNC-1T.

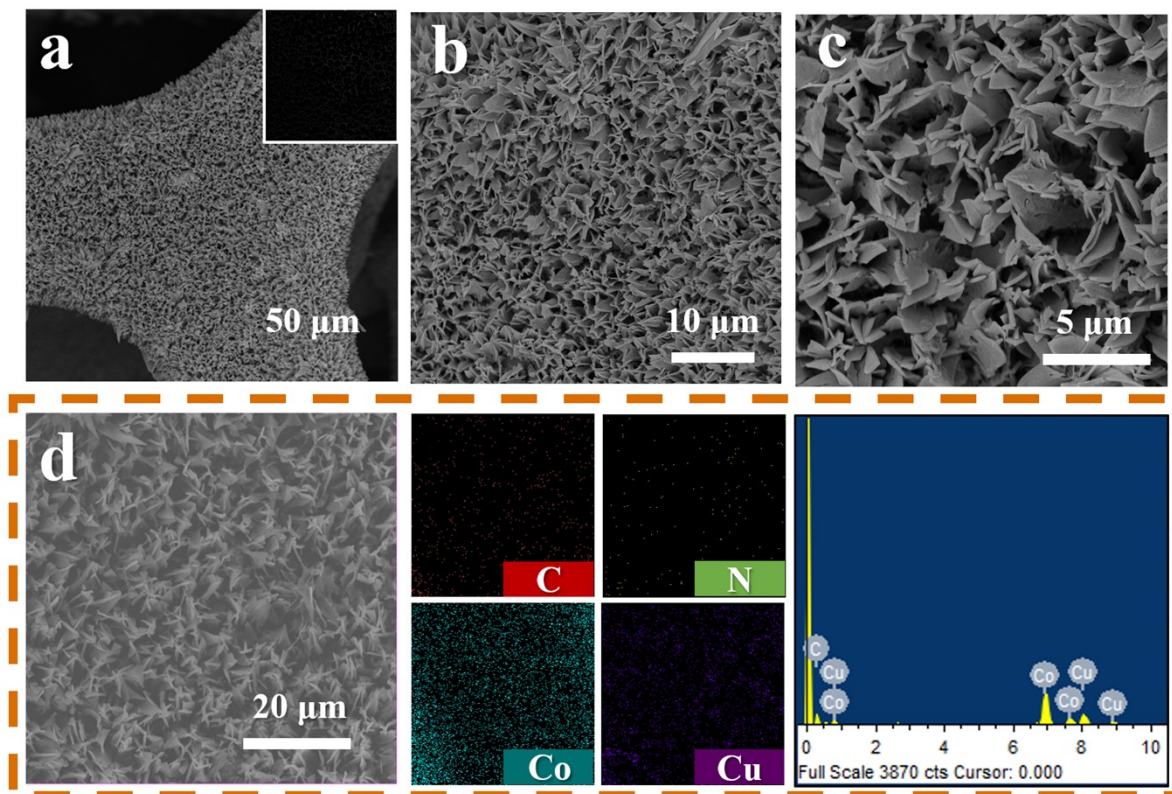

**Figure S11. Characterization of CF@CoNC-2T.** (a-c) Low- and high-magnification SEM images of CF@CoNC-2T after spraying a conductive Au coating. (d) SEM image of CF@CoNC-2T without a conductive coating and its corresponding EDS mapping images and element spectrum. The inset in (a) is the optical photograph of CF@CoNC-2T.

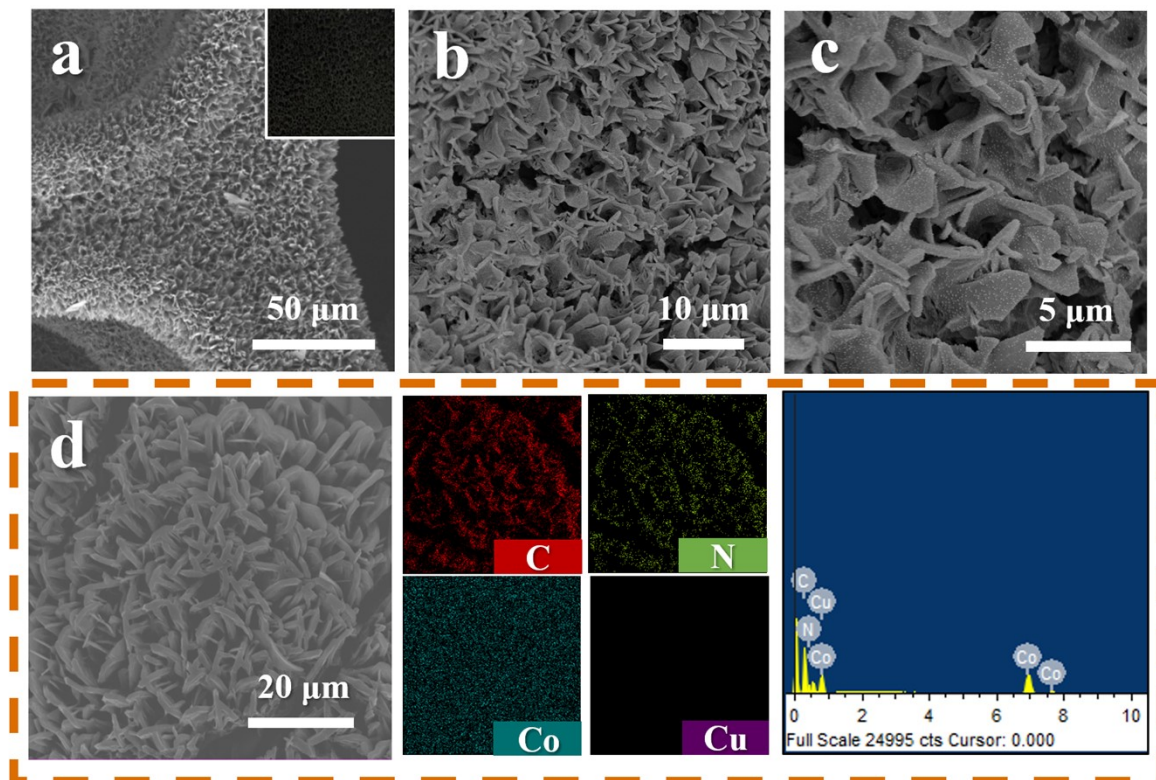

**Figure S12. Characterization of CF@CoNC-3T.** (a-c) Low- and high-magnification SEM images of CF@CoNC-3T after spraying a conductive Au coating. (d) SEM image of CF@CoNC-3T without a conductive coating and its corresponding EDS mapping images and element spectrum. The inset in (a) is the optical photograph of CF@CoNC-3T.

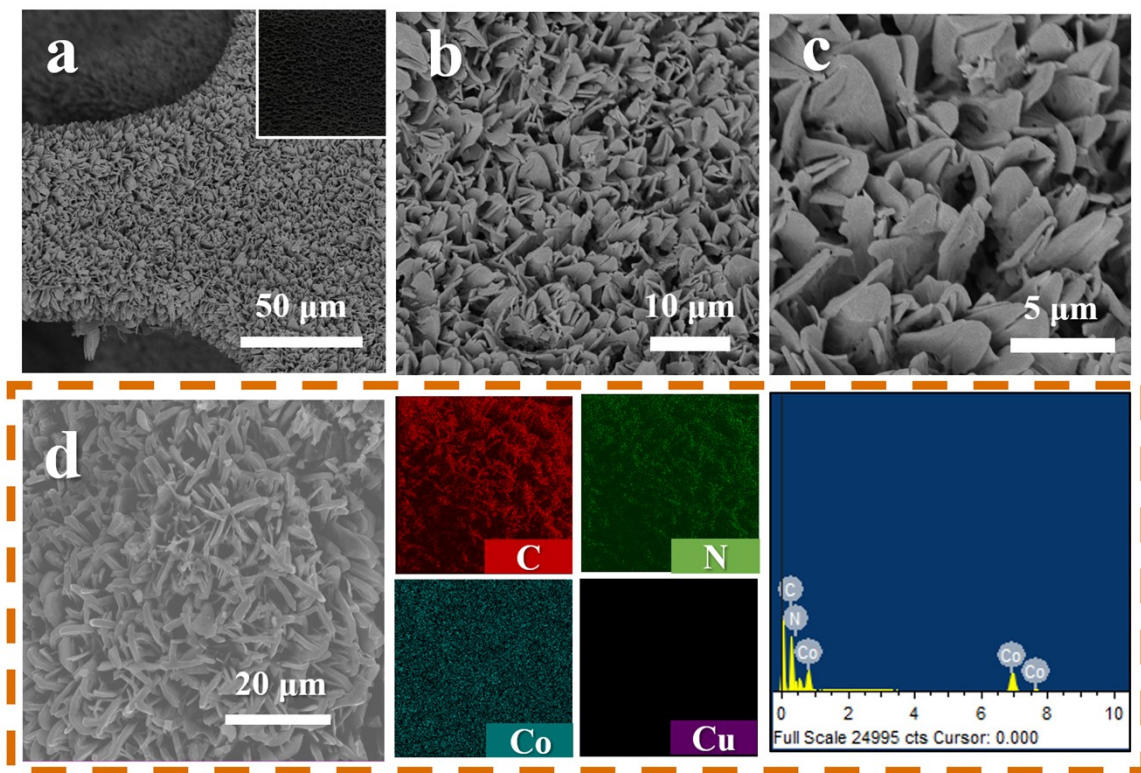

**Figure S13. Characterization of CF@CoNC-4T.** (a-c) Low- and high-magnification SEM images of CF@CoNC-4T after spraying a conductive Au coating. (d) SEM image of CF@CoNC-4T without a conductive coating and its corresponding EDS mapping images and element spectrum. The inset in (a) is the optical photograph of CF@CoNC-4T.

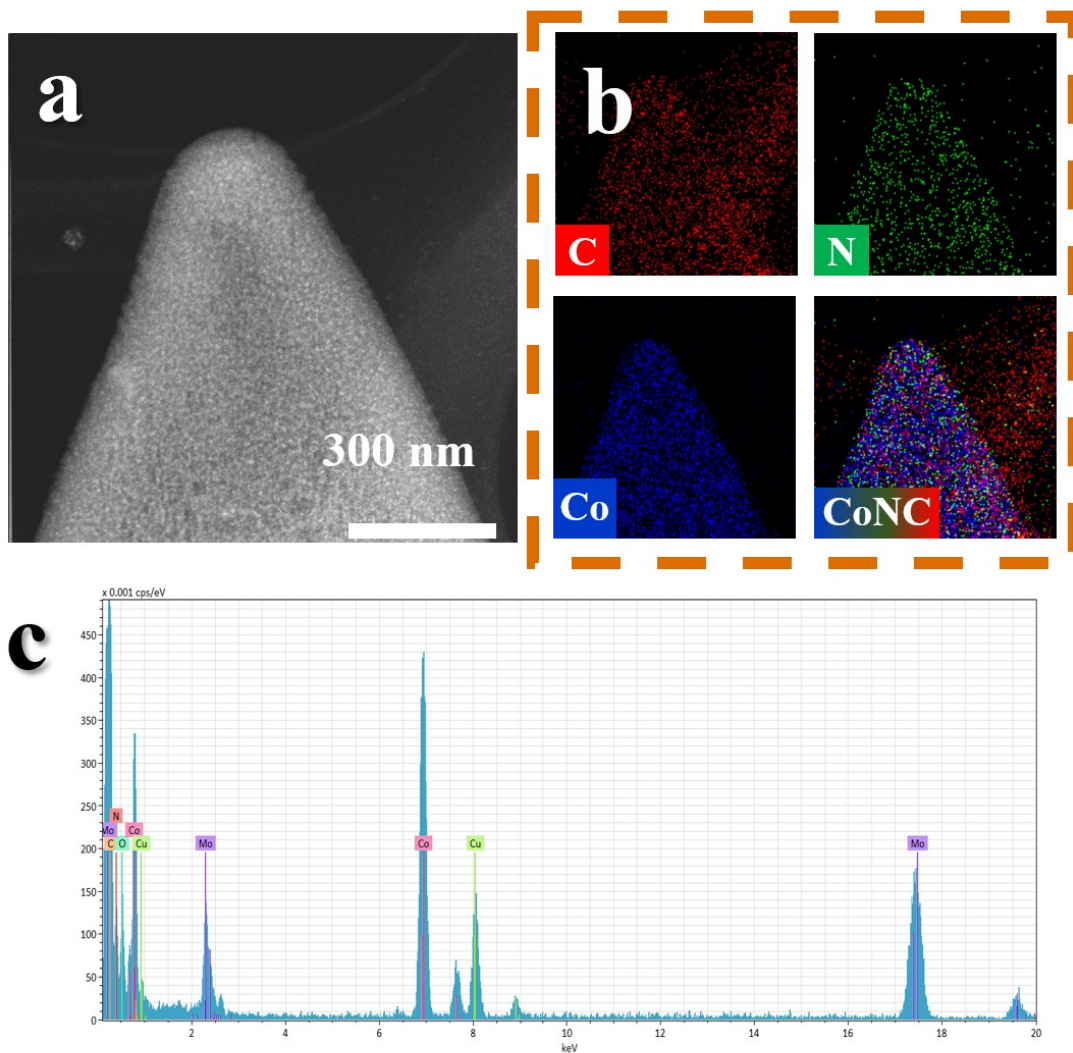

**Figure S14.** (a) HAADF-STEM and (b) EDS mapping images and (c) the corresponding elemental spectrum of CF@CoNC-1T.

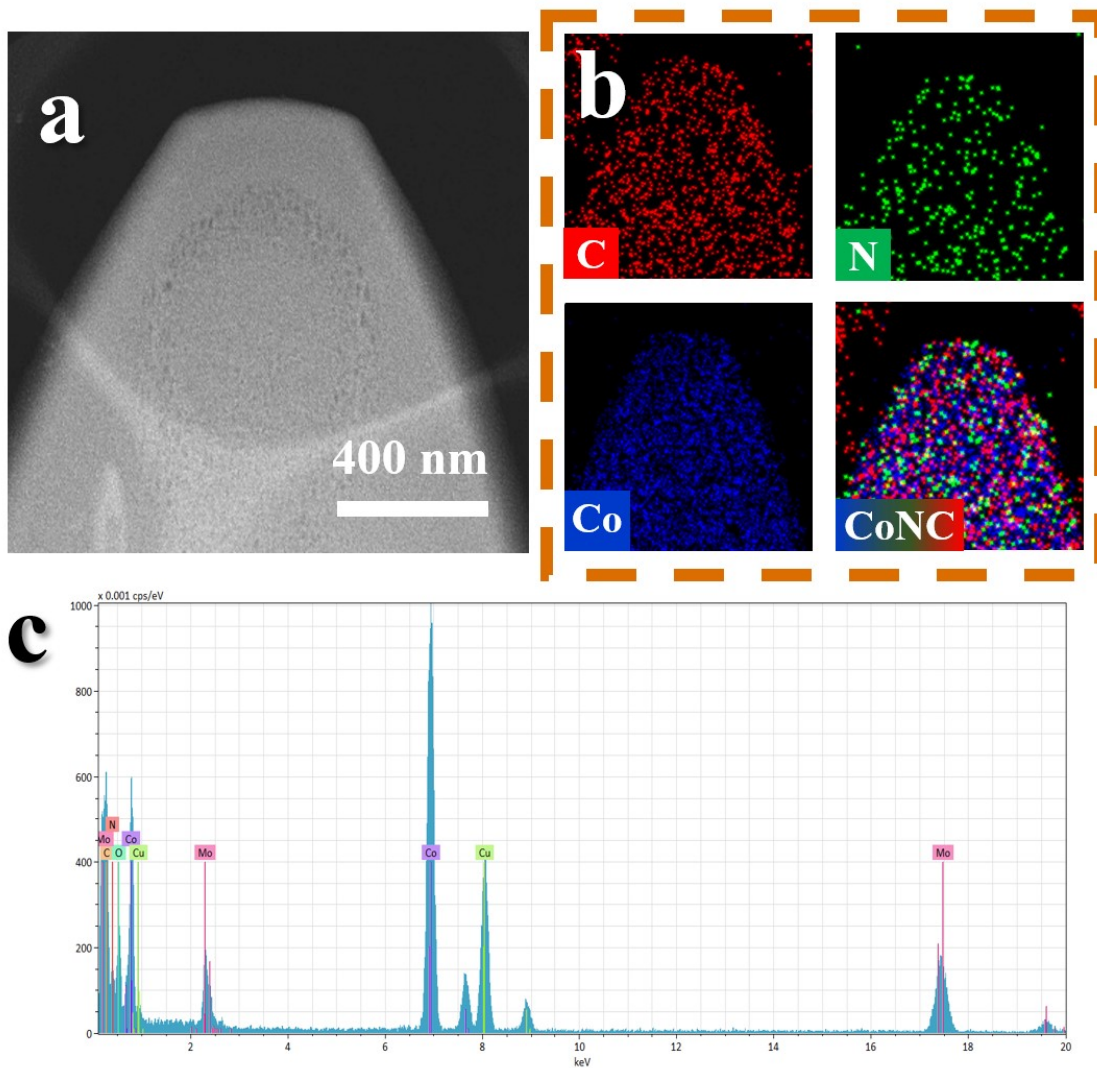

**Figure S15.** (a) HAADF-STEM and (b) EDS mapping images and (c) the corresponding elemental spectrum of CF@CoNC-2T.



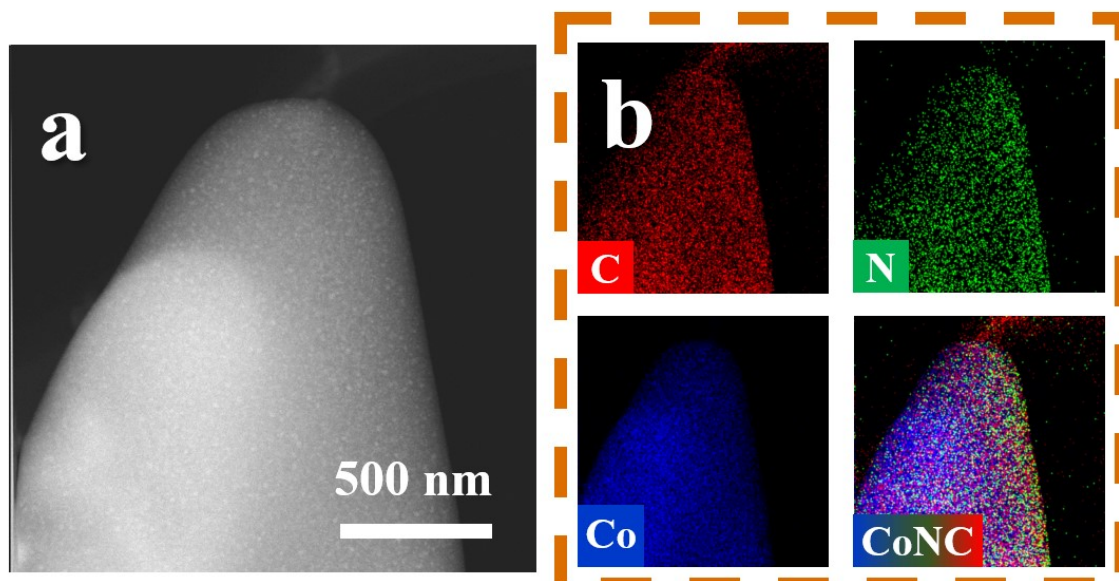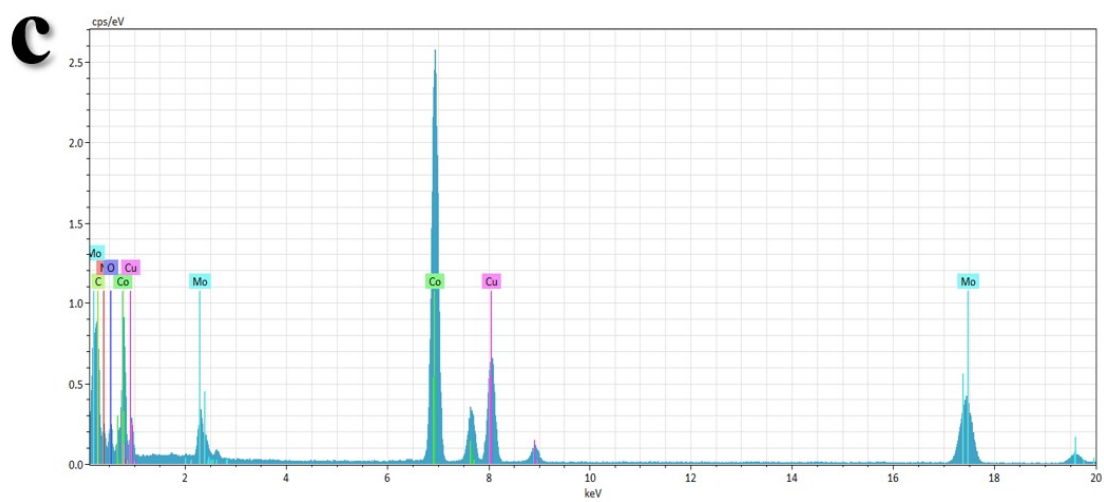

**Figure S16.** (a) HAADF-STEM and (b) EDS mapping images and (c) the corresponding elemental spectrum of CF@CoNC-3T.

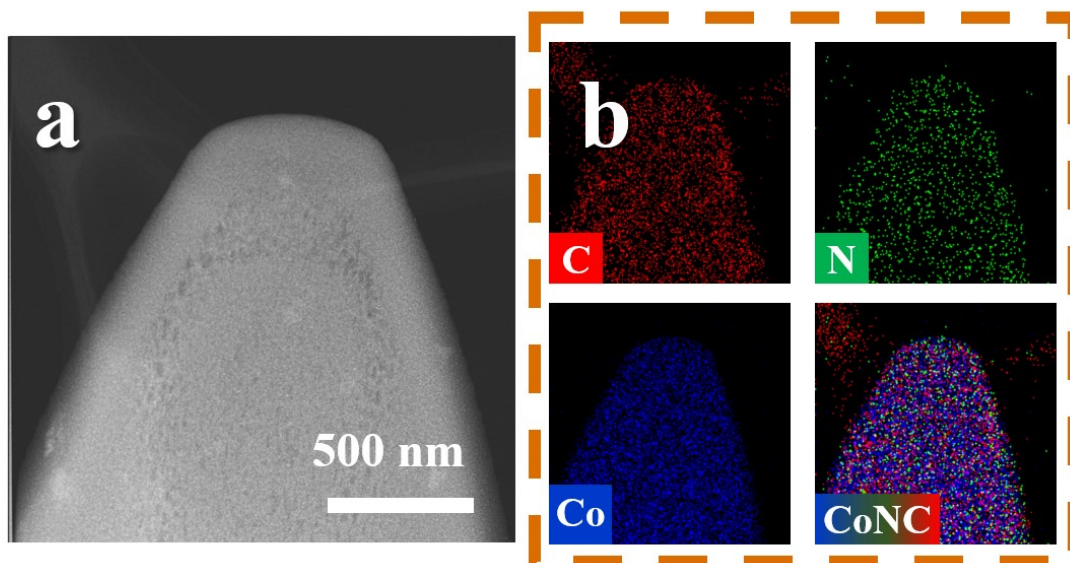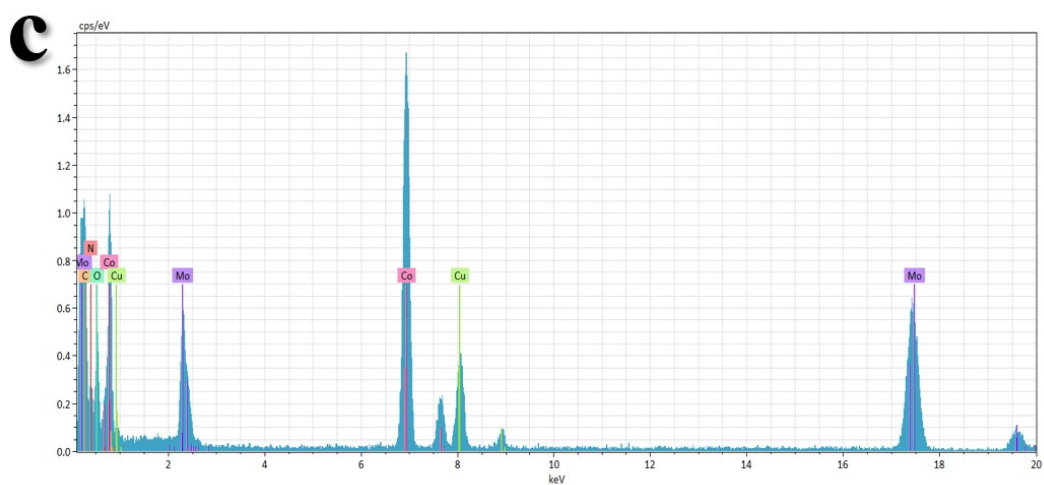

**Figure S17.** (a) HAADF-STEM and b) EDS mapping images and c) the corresponding elemental spectrum of CF@CoNC-4T.

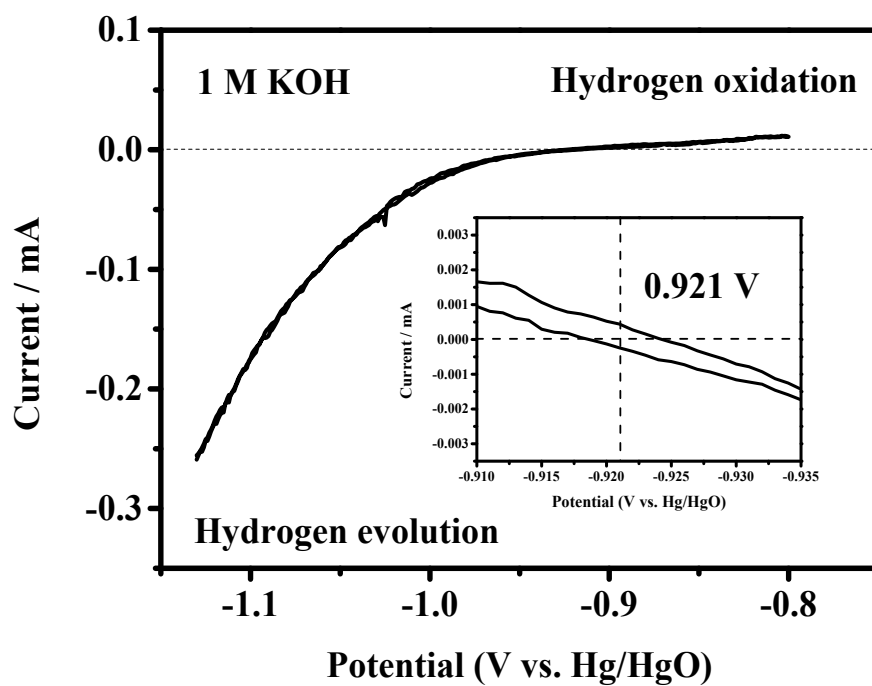

**Figure S18.** Single cycle CV curve of Hg/HgO electrode calibration in 1 M KOH at room temperature ( $\sim 298$  K).

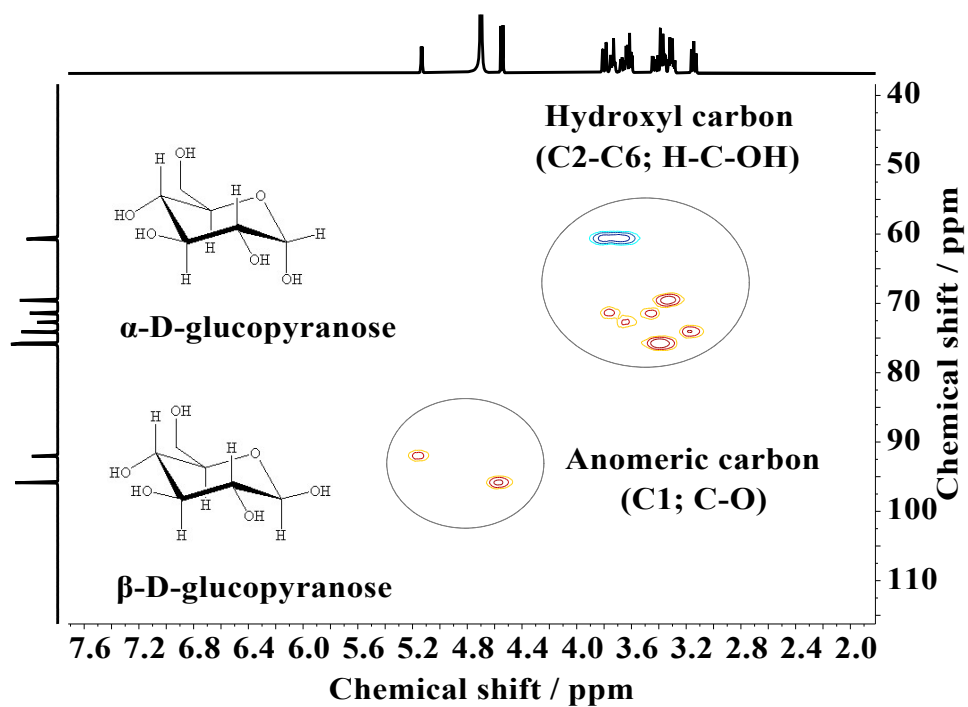

**Figure S19.** 2D HSQC NMR spectrum of pure D-glucose (absolute stereochemistry) in D<sub>2</sub>O at 298 K.

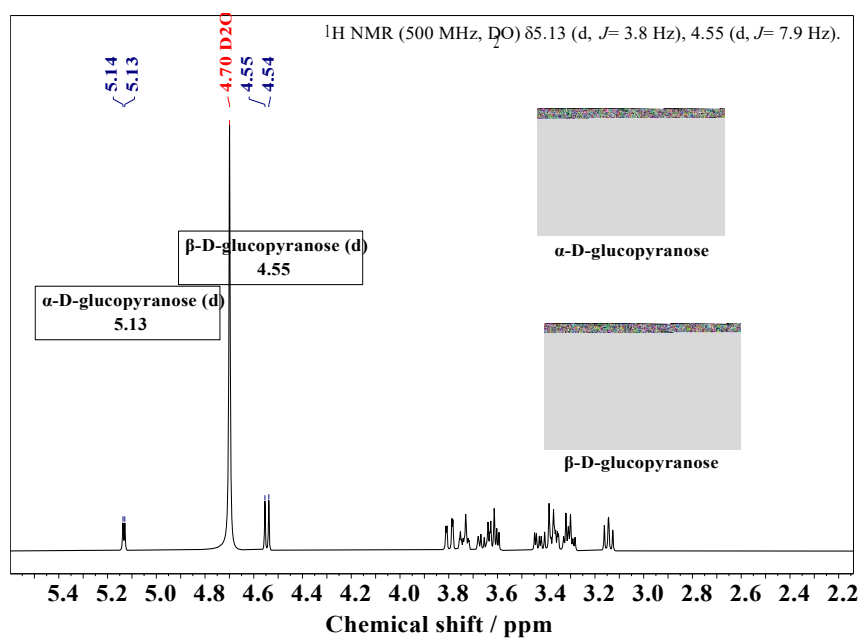

**Figure S20.**  $^1\text{H}$  NMR (500 MHz) spectrum of pure D-glucose (absolute stereochemistry) in  $\text{D}_2\text{O}$  at 298 K.

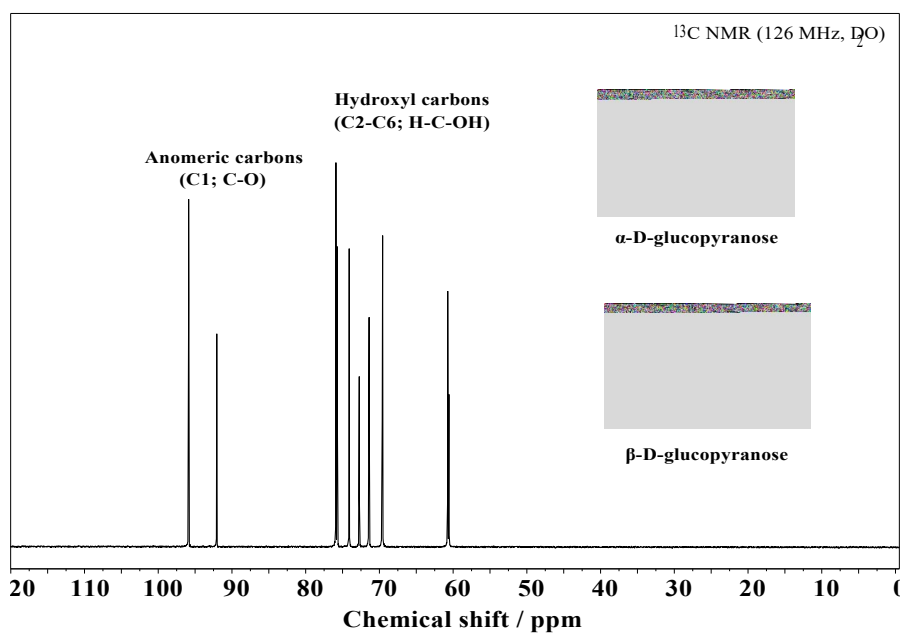

**Figure S21.** <sup>13</sup>C NMR (126 MHz) spectrum of pure D-glucose (absolute stereochemistry) in D<sub>2</sub>O at 298 K.

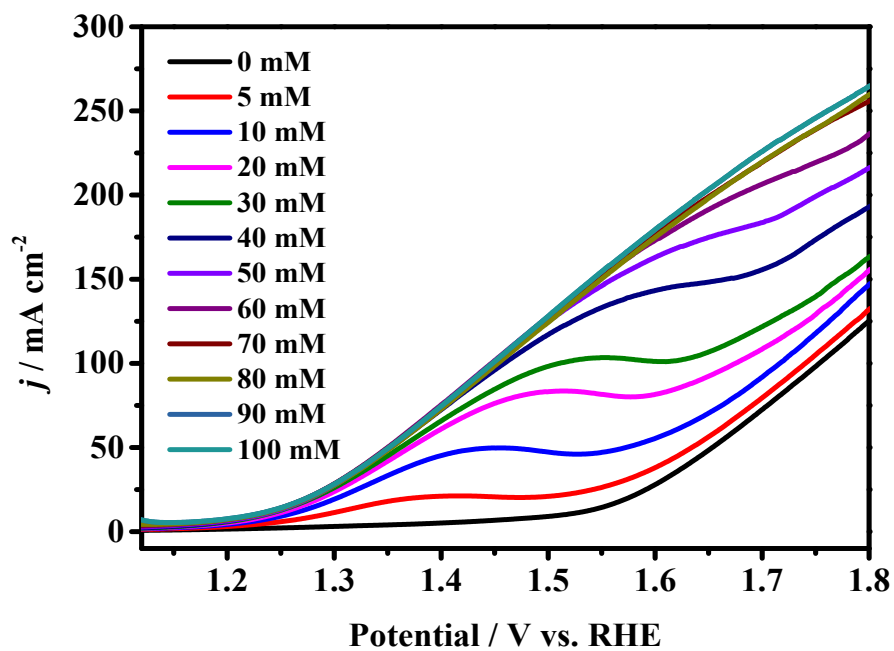

**Figure S22.** LSV curves of the CF@CoNC-1T electrode for glucose oxidation with different concentrations of glucose (0-100 mM).

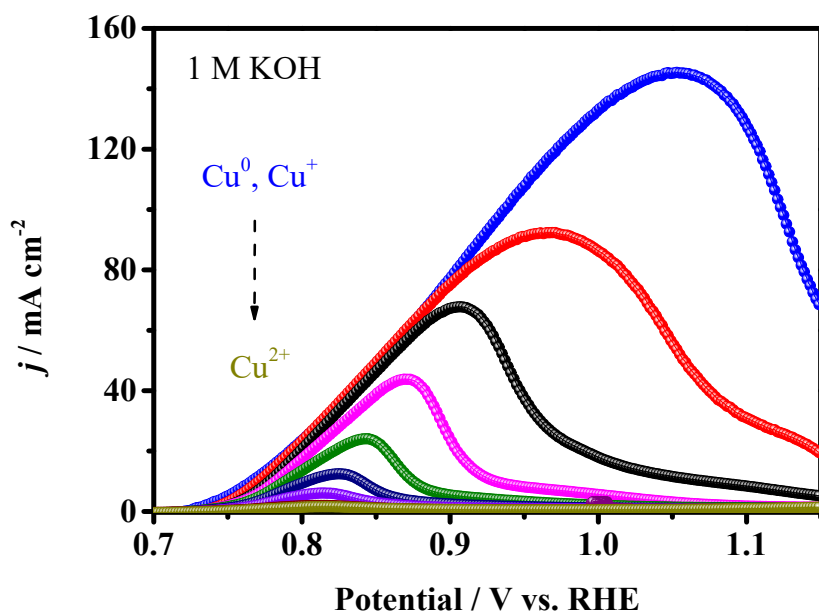

**Fig. S23.** LSV curves of the CF@CoNC-1T electrode in 1 M KOH. The oxidation peaks ( $\text{Cu}^0$ ,  $\text{Cu}^{1+} \rightarrow \text{Cu}^{2+}$ ) are gradually disappeared with multiple polarization curves scanning.



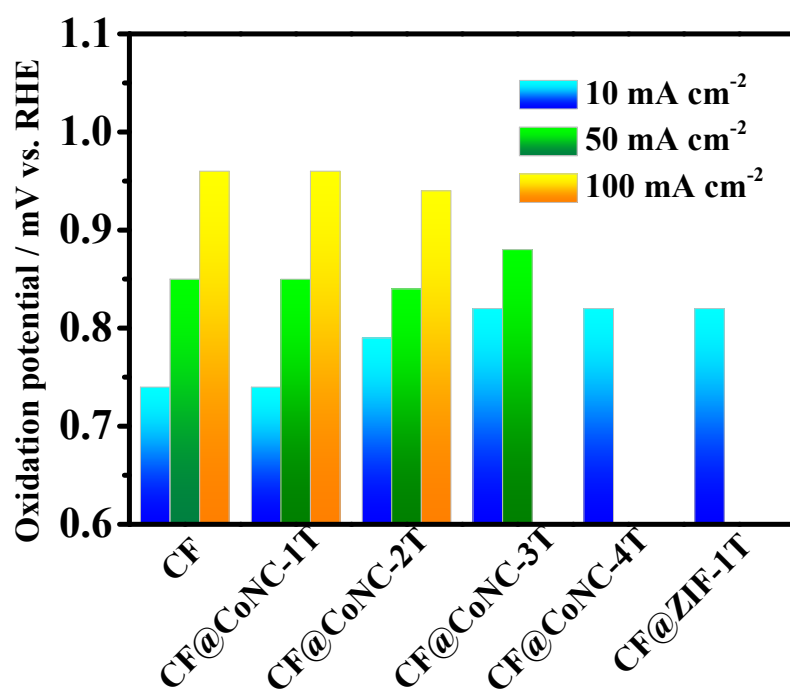

**Figure S24.** The copper oxidation potentials at different current densities for various electrocatalysts.

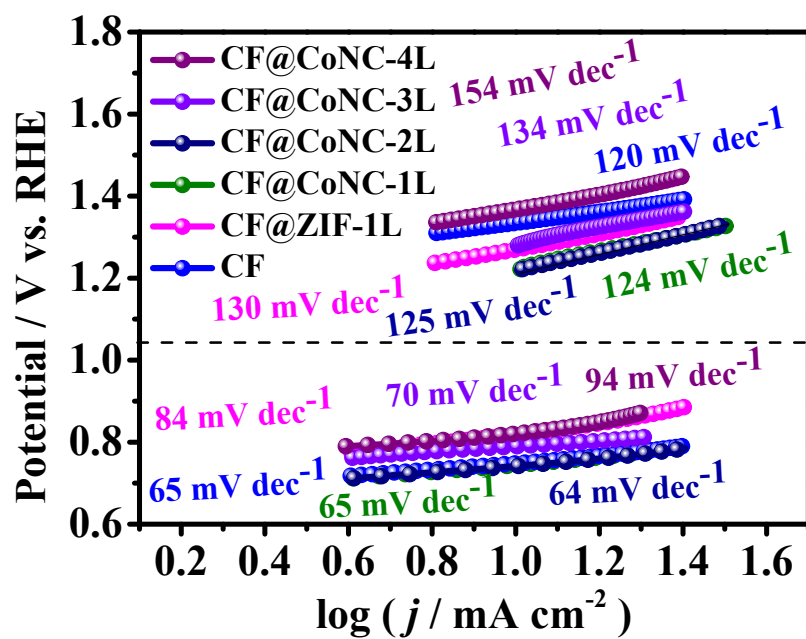

**Figure S25.** Tafel plots of copper foam (CF), CF@ZIF-1T and CF@CoNC-xT (x = 1-4) in copper oxidation and glucose oxidation reactions.

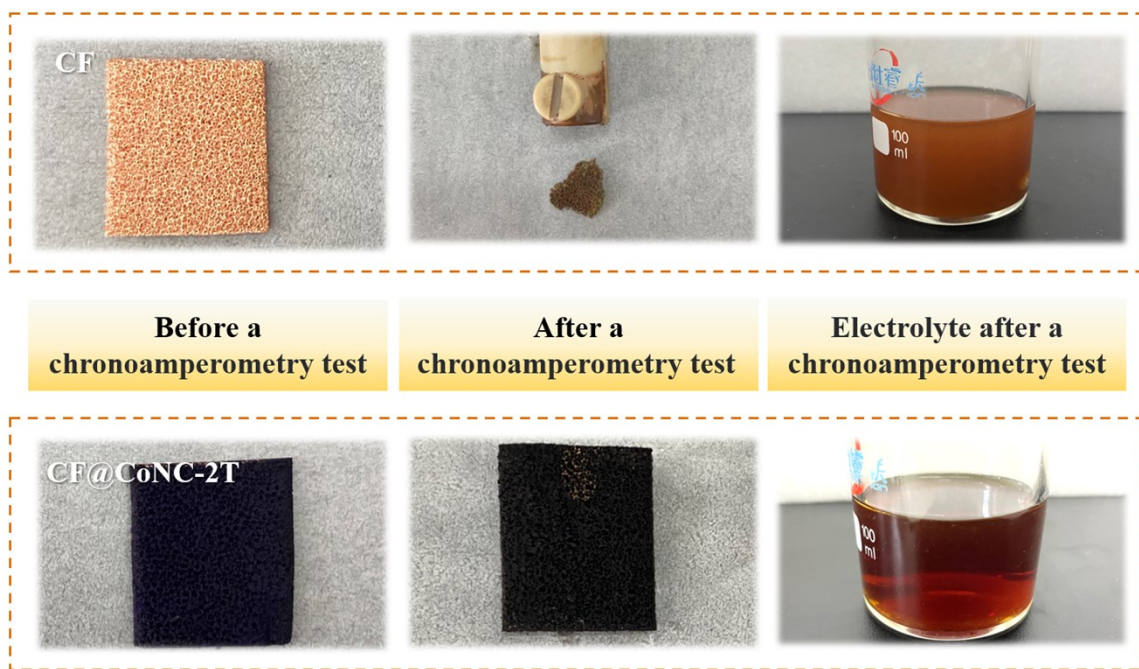

**Figure S26.** Optical images of the fresh and used CF and CF@CoNC and the used electrolyte solutions.

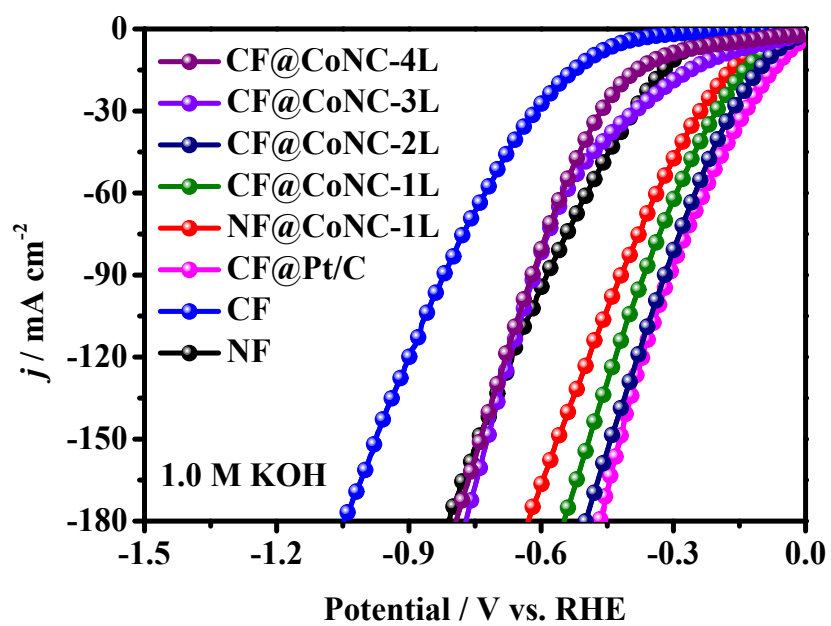

**Figure S27.** LSV curves of various electrocatalysts for HER without iR correction.

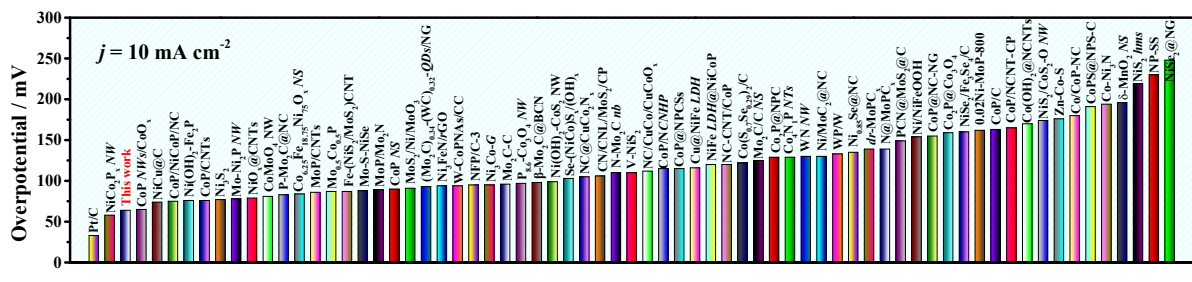

**Figure S28.** Comparison of the overpotential ( $j = 10 \text{ mA cm}^{-2}$ ) of our CF@CoNC-2T electrode with various previously reported HER electrocatalysts in 1 M KOH electrolyte.

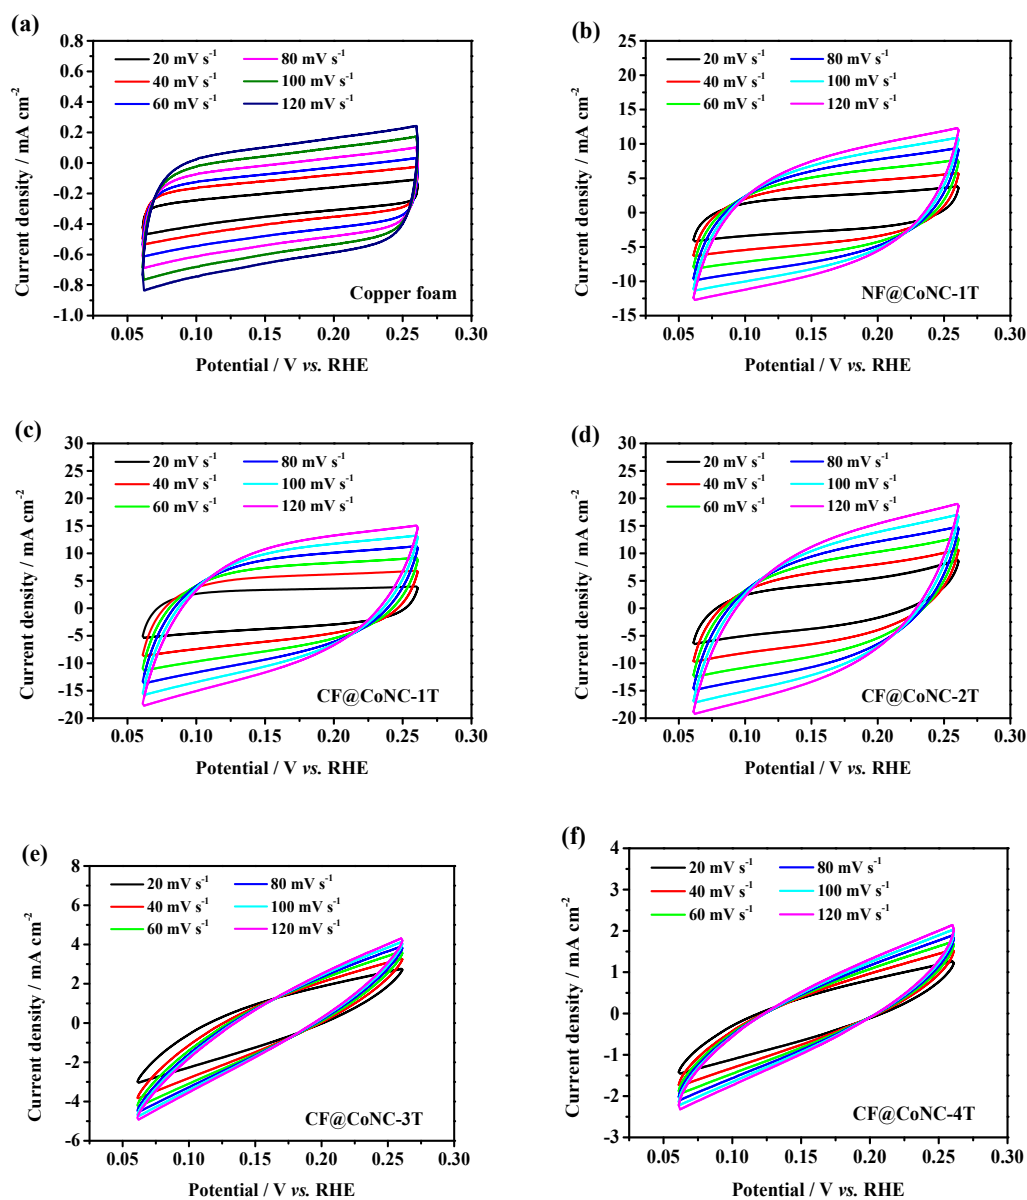

**Figure S29.** Cyclic voltammety curves of (a) CF, (b) NF@CoNC-1T, (c) CF@CoNC-1T, (d) CF@CoNC-2T, (e) CF@CoNC-3T and (f) CF@CoNC-4T at different scan rates (20, 40, 60, 80, 100 and 120 mV s<sup>-1</sup>) in 1.0 M KOH.

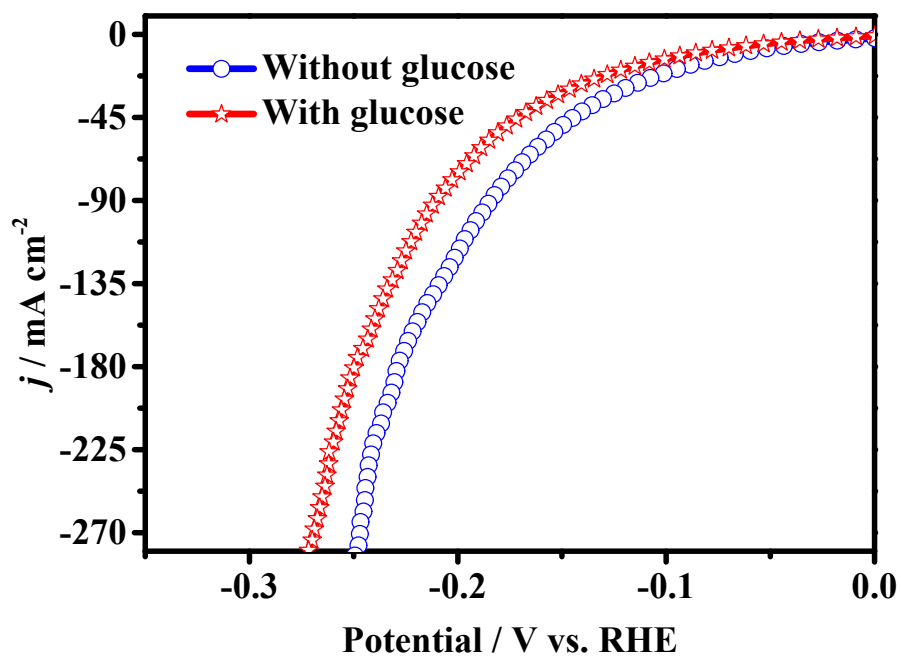

**Figure S30.** The LSV polarization curves of the CF@CoNC-2T electrode with and without 100 mM glucose in HER.

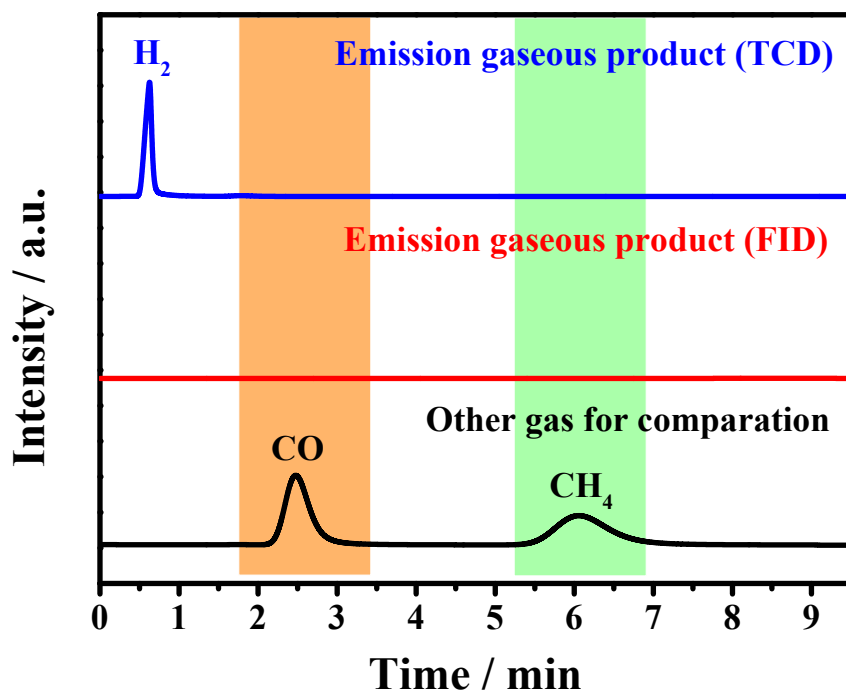

Figure S31. Analysis of emission gas by GC instrument.



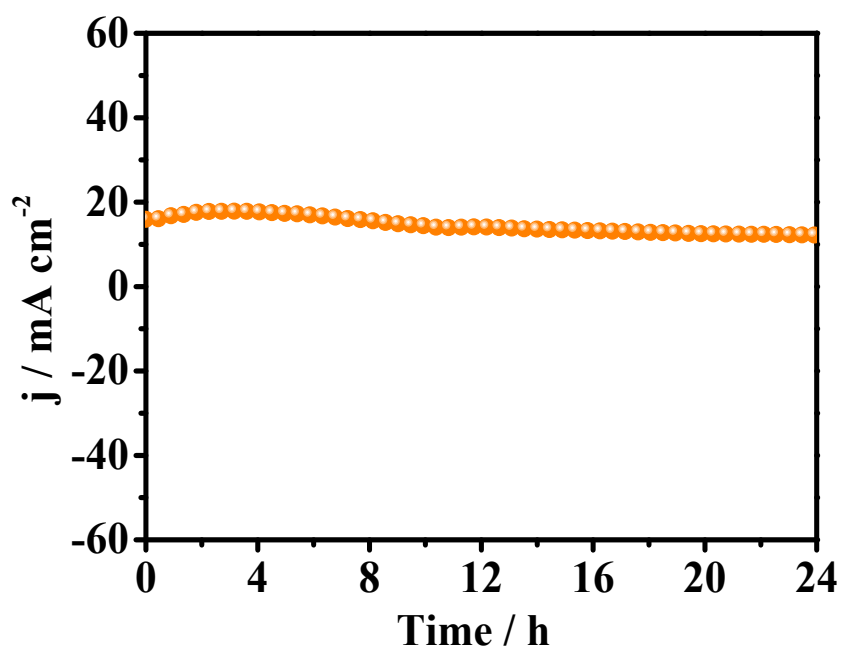

**Figure S32.** Long-term durability of the CF@CoNC-1T anode in a two-electrode system.

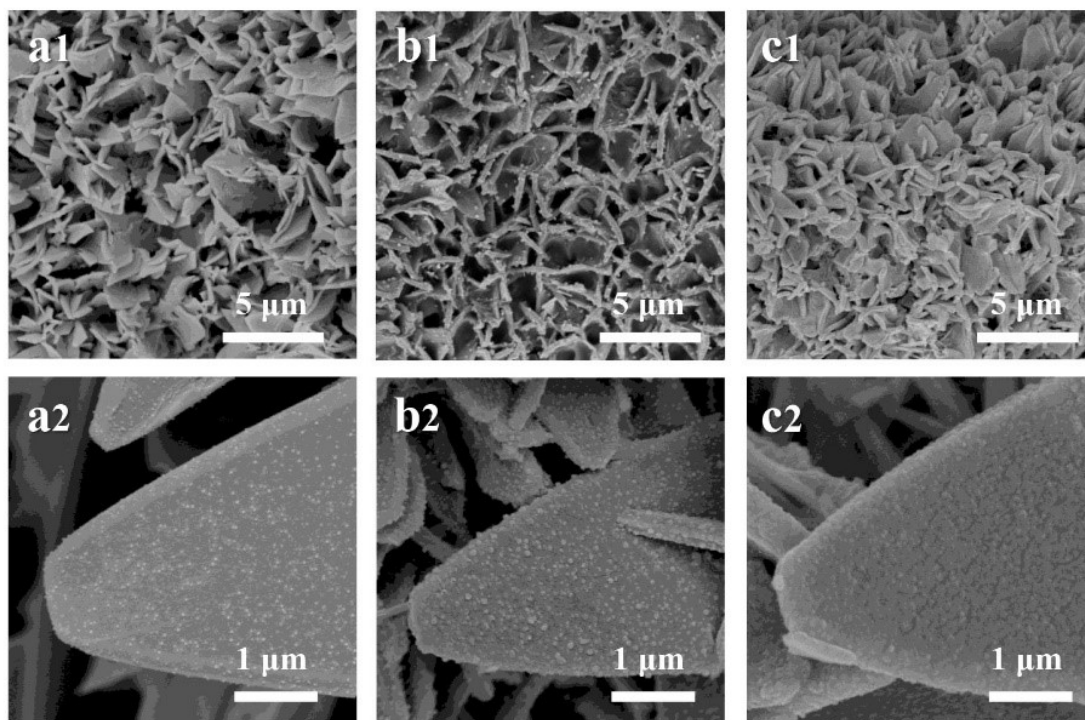

**Figure S33.** Low- and high-magnification SEM images of a) the fresh CF@CoNC-2T electrode, and b) the anodic CF@CoNC-2T and c) cathodic CF@CoNC-2T electrodes after the stability test.

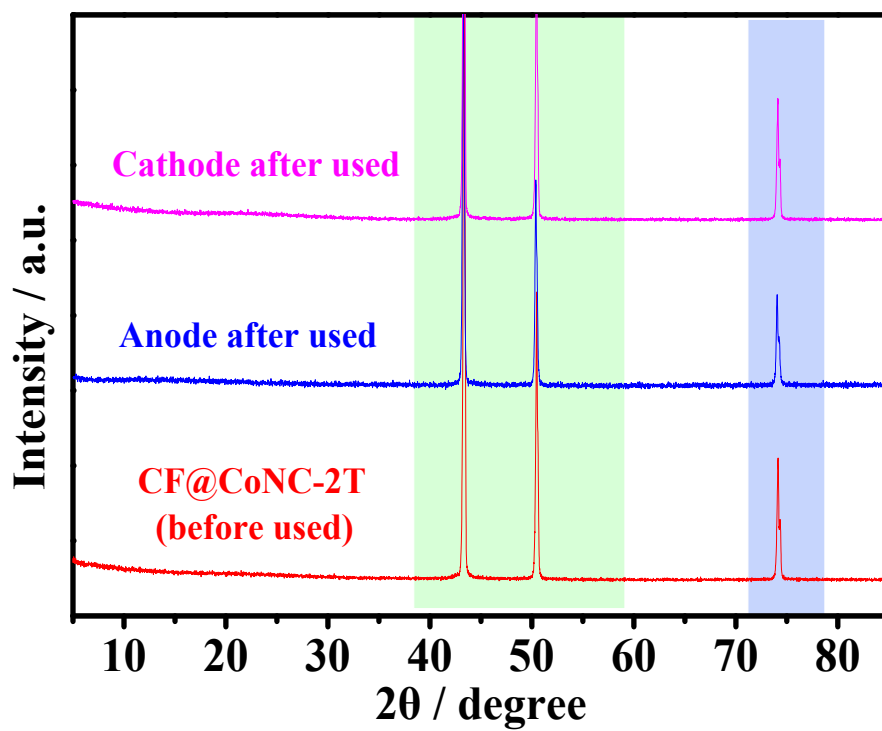

Figure S34. XRD patterns of CC@CoNC-600 electrode after used on cathode and anode.

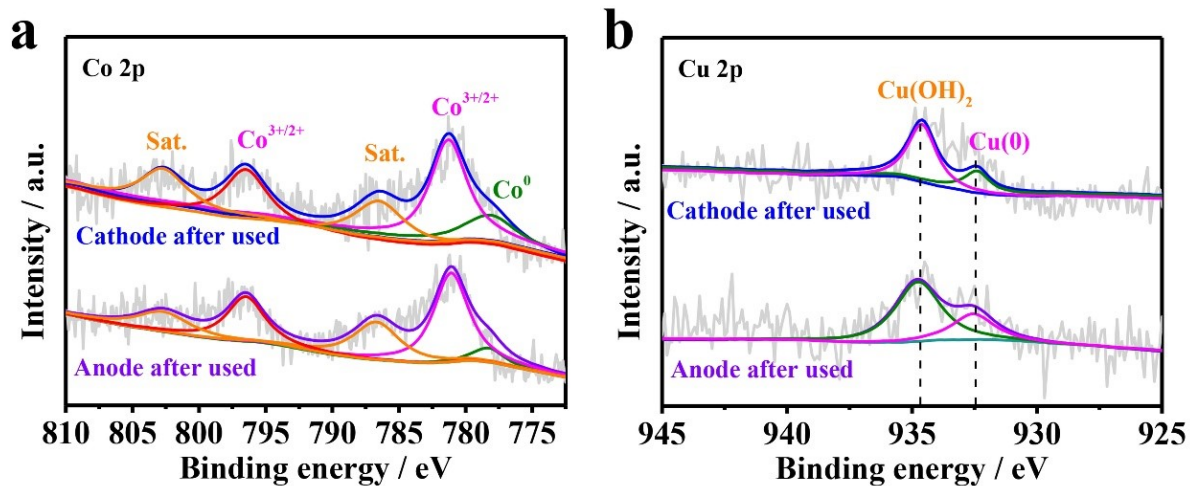

**Figure S35.** The high-resolution (a) Co 2p XPS spectra and (b) Cu 2p XPS spectra of CC@CoNC-2T electrode after used on cathode and anode.

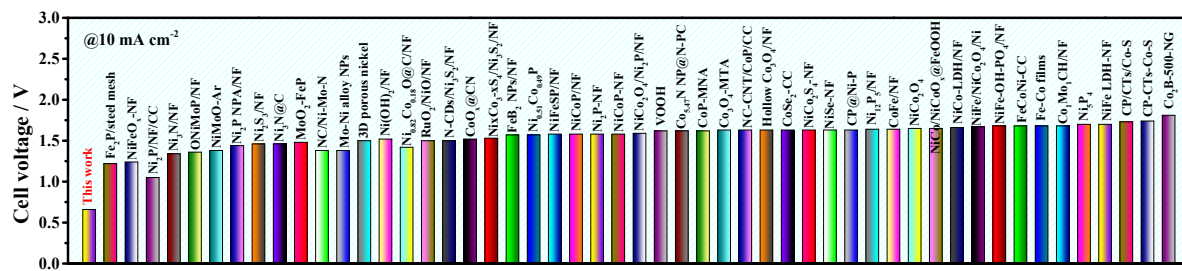

**Figure S36.** Comparison of the cell voltages of our system with some previously reported state-of-the-art electrocatalysts in overall water splitting H<sub>2</sub> production system.

## Supplementary Tables

**Table S1.** Comparison of the element contents of CF, CF@ZIF-xT and CoNC-xT (x = 1-4) obtained from their SEM-EDS spectra.

| <b>Element /%</b> | <b>C</b> | <b>N</b> | <b>Co</b> | <b>Cu</b> |
|-------------------|----------|----------|-----------|-----------|
| <b>CF@ZIF-1T</b>  | 61.68    | 16.82    | 21.35     | 0.15      |
| <b>CF@ZIF-2T</b>  | 58.26    | 35.54    | 6.10      | 0.10      |
| <b>CF@ZIF-3T</b>  | 60.58    | 32.09    | 7.28      | 0.05      |
| <b>CF@ZIF-4T</b>  | 58.12    | 35.13    | 6.74      | 0         |
| <b>CF@CoNC-1T</b> | 68.23    | 18.20    | 11.05     | 2.53      |
| <b>CF@CoNC-2T</b> | 51.39    | 2.39     | 45.45     | 0.78      |
| <b>CF@CoNC-3T</b> | 56.46    | 31.18    | 12.36     | 0         |
| <b>CF@CoNC-4T</b> | 56.13    | 33.11    | 10.75     | 0         |
| <b>CF</b>         | 5.53     | 0.95     | 0         | 93.97     |

**Table S2.** Comparison of the HER performance of CF@CoNC-2T with various previously reported electrocatalysts in 1M KOH solution.

| Catalysts                                                                 | $\eta@10 \text{ mA cm}^{-2}$<br>/ mV | References                                        |
|---------------------------------------------------------------------------|--------------------------------------|---------------------------------------------------|
| CF@CoNC-2T                                                                | 64                                   | This work                                         |
| Pt/C                                                                      | 33                                   | Adv. Energy Mater., 2017, 8, 1701601              |
| NiCo <sub>2</sub> P <sub>x</sub> NW                                       | 58                                   | Adv. Mater., 2017, 29, 1605502.                   |
| CoP NWs/CoO <sub>x</sub>                                                  | 65                                   | Adv. Mater., 2018, 30, 1703322.                   |
| NiCu@C                                                                    | 74                                   | Adv. Energy Mater., 2018, 8, 1701759              |
| CoP/NiCoP/NC                                                              | 75                                   | Adv. Funct. Mater., 2019, 29, 1807976.            |
| Ni(OH) <sub>2</sub> -Fe <sub>2</sub> P                                    | 76                                   | Chem. Commun, 2018, 54, 1201-1204.                |
| CoP/CNTs                                                                  | 76                                   | Adv. Funct. Mater., 2017, 27, 1606635.            |
| Ni <sub>3</sub> S <sub>2</sub>                                            | 77                                   | ACS Appl. Mater. Interfaces, 2017, 9, 40162-40170 |
| Mo-Ni <sub>2</sub> P NW                                                   | 78                                   | Nanoscale, 2017, 9, 16674-16679                   |
| NiO <sub>x</sub> @CNTs                                                    | 79                                   | ACS Appl. Mater. Interfaces, 2017, 9, 7139-7147.  |
| CoMoO <sub>4</sub> NW                                                     | 81                                   | ACS Sustain. Chem. Eng, 2017, 5, 10093-10098.     |
| P-Mo <sub>2</sub> C@NC                                                    | 83                                   | Chem. Asian J, 2018, 13, 158-163.                 |
| Co <sub>6.25</sub> Fe <sub>18.75</sub> Ni <sub>75</sub> O <sub>x</sub> NS | 84                                   | J. Mater. Chem. A, 2018, 6, 167-178.              |
| MoP/CNTs                                                                  | 86                                   | Adv. Funct. Mater, 2018, 28, 1706523.             |
| Ni <sub>0.5</sub> Co <sub>0.5</sub> P                                     | 87                                   | Electrochim. Acta, 2017, 249, 301-307.            |
| Fe-(NiS <sub>2</sub> /MoS <sub>2</sub> )/CNT                              | 87                                   | J. Mater. Chem. A, 2020, 8, 17527-17536.          |
| Mo-S-NiSe                                                                 | 88                                   | J. Mater. Chem. A, 2017, 5, 20588-20593.          |
| MoP/Mo <sub>2</sub> N                                                     | 89                                   | Angew. Chem. Int. Ed., 2021, 133, 2-11.           |
| CoP NS                                                                    | 90                                   | New J. Chem, 2017, 41, 2436-2442.                 |
| MoS <sub>2</sub> /NiS/MoO <sub>3</sub>                                    | 91                                   | ACS Appl. Mater. Interfaces, 2017, 9, 7084-7090.  |
| (Mo <sub>2</sub> C) <sub>0.34</sub> -(WC) <sub>0.32</sub> -QDs/NG         | 93                                   | J. Mater. Chem. A, 2017, 5, 18494-18501.          |
| Ni <sub>3</sub> FeN/rGO                                                   | 94                                   | ACS Nano, 2018, 12, 245-253.                      |
| W-CoPNAs/CC                                                               | 94                                   | Small, 2019, 15, 1902613.                         |

|                                                           |     |                                                     |
|-----------------------------------------------------------|-----|-----------------------------------------------------|
| NFP/C-3                                                   | 95  | Sci. Adv., 2019, 5, eaav6009.                       |
| Ni <sub>3</sub> Co-G                                      | 95  | New J. Chem, 2017, 41, 5916-5923.                   |
| Mo <sub>2</sub> C-C                                       | 96  | J. Mater. Chem. A, 2017, 5, 4879-4885.              |
| P <sub>8.6</sub> -Co <sub>3</sub> O <sub>4</sub> NW       | 97  | ACS Catal, 2018, 8, 2236-2241.                      |
| β-Mo <sub>2</sub> C@BCN                                   | 98  | J. Mater. Chem. A, 2017, 5, 13122-13129.            |
| Ni(OH) <sub>2</sub> -CoS <sub>2</sub> NW                  | 99  | Nanoscale, 2017, 99, 16632-16637.                   |
| Se-(NiCo)S <sub>x</sub> /(OH) <sub>x</sub>                | 103 | Adv. Mater, 2018, 30, 1705538.                      |
| NC@CuCo <sub>2</sub> N <sub>x</sub>                       | 105 | Adv. Funct. Mater, 2017, 27, 1704169.               |
| CN/CNL/MoS <sub>2</sub> /CP                               | 106 | Chem. Eng. J., 2012, 412, 128556.                   |
| N-Mo <sub>2</sub> C nb                                    | 110 | Appl. Catal. B, 2018, 224, 533-540.                 |
| V-NiS <sub>2</sub>                                        | 110 | ACS Nano, 2017, 11, 11574-11583.                    |
| NC/CuCo/CuCoO <sub>x</sub>                                | 112 | Adv. Funct. Mater, 2018, 28, 1704447.               |
| CoP/NCNHP                                                 | 115 | J. Am. Chem. Soc, 2018, 140, 2610-2618.             |
| CoP@NPCSs                                                 | 115 | ACS Appl. Mater. Inter., 2018, 10, 51, 44201-44208. |
| Cu@NiFe LDH                                               | 116 | Energy Environ. Sci, 2017, 10, 1820-1827.           |
| NiFe LDH@NiCoP                                            | 120 | Adv. Funct. Mater, 2018, 28, 1706847.               |
| NC-CNT/CoP                                                | 120 | J. Mater. Chem. A, 2018, 6,9009.                    |
| Co(S <sub>0.71</sub> Se <sub>0.29</sub> ) <sub>2</sub> /C | 122 | Adv. Funct. Mater, 2017, 27, 1701008.               |
| Mo <sub>2</sub> C/C NS                                    | 125 | ACS Appl. Mater. Interfaces, 2017, 9, 41314-41322.  |
| Co <sub>2</sub> P@NPC                                     | 129 | Nanoscale, 2018, 10, 2902-2907.                     |
| Co <sub>4</sub> Ni <sub>1</sub> P NTs                     | 129 | Adv. Funct. Mater, 2017, 27, 1703455.               |
| WN NW                                                     | 130 | J. Mater. Chem. A, 2017, 5, 19072-19078.            |
| Ni/MoC <sub>2</sub> @NC                                   | 130 | Adv. Energy Mater, 2017, 7, 1700220.                |
| WP/W                                                      | 133 | Chem. Eng. J, 2017, 327, 705-712.                   |
| Ni <sub>0.85</sub> Se@NC                                  | 135 | Small, 2020, 16, 2004231.                           |
| dr-MoN                                                    | 139 | J. Mater. Chem. A, 2017,5, 24193-24198.             |
| N@MoPC <sub>x</sub>                                       | 139 | Adv. Energy Mater, 2017, 8, 1701601.                |
| PCN@MoS <sub>2</sub> @C                                   | 149 | Chem. Commun., 2020, 56, 13393-13396.               |



|                                                       |     |                                                   |
|-------------------------------------------------------|-----|---------------------------------------------------|
| Ni/NiFeOOH                                            | 154 | ACS Appl. Mater. Interfaces, 2018, 10, 8585-8593. |
| CoP@NC-NG                                             | 155 | Small, 2018, 14, 1702895.                         |
| Co <sub>2</sub> P@Co <sub>3</sub> O <sub>4</sub>      | 159 | J. Power Sources, 2018, 374, 142-148.             |
| NiSe <sub>2</sub> /Fe <sub>3</sub> Se <sub>4</sub> /C | 160 | J. Power Sources, 2017, 366,193-199.              |
| 0.02Ni-MoP-800                                        | 162 | Nano Energy, 2020, 70, 104445.                    |
| CoP/C                                                 | 163 | J. Energy Chem, 2017, 26, 1147-1152.              |
| CoP/NCNT-CP                                           | 165 | ACS Sustainable Chem. Eng., 2019, 7, 10044-10051. |
| Co(OH) <sub>2</sub> @NCNTs                            | 170 | Nano Energy, 2018, 47, 96-104.                    |
| NiS <sub>2</sub> /CoS <sub>2</sub> -O <i>NW</i>       | 174 | Adv. Mater, 2017, 29, 1704681.                    |
| Zn-Co-S                                               | 176 | Nanoscale, 2018, 10, 1774-1778.                   |
| Co/CoP-NC                                             | 180 | Mater. Horiz, 2018, 5, 108-115.                   |
| CoPS@NPS-C                                            | 191 | J. Mater. Chem. A, 2018, 6, 10433-10440.          |
| Co-Ni <sub>3</sub> N                                  | 194 | Adv. Mater, 2018, 30, 1705516.                    |
| δ-MnO <sub>2</sub> <i>NS</i>                          | 196 | Adv. Energy Mater, 2017, 7, 1700005.              |
| NiS <sub>2</sub> <i>hms</i>                           | 219 | J. Mater. Chem. A, 2017, 5, 20985-20992.          |
| NP-SS                                                 | 230 | Adv. Mater., 2017, 29, 1702095                    |
| NiSe <sub>2</sub> @NG                                 | 248 | ACS Sustainable Chem. Eng., 2019, 7, 4351-4359.   |
| Co <sub>9</sub> S <sub>8</sub> @NOSC                  | 320 | Adv. Funct. Mater., 2017, 17, 1606585.            |
| NS-C                                                  | 380 | ACS Nano, 2017, 11, 7293-7300.                    |

**Table S3.** Comparison of the required cell voltage and electricity consumption of our CF@CoNC-2T with several state-of-the-art noble-metal-free electrocatalysts for various organic-assisted electrocatalysis H<sub>2</sub> production systems.

| <b>Organic</b>  | <b>Catalysts</b>                   | <b>Voltage / V<br/>100 mA cm<sup>-2</sup></b> | <b>Electricity<br/>consumption /<br/>KWh m<sup>-3</sup> H<sub>2</sub></b> | <b>References</b>                                        |
|-----------------|------------------------------------|-----------------------------------------------|---------------------------------------------------------------------------|----------------------------------------------------------|
|                 | CF@CoNC-2T                         | 0.90                                          | 1.97                                                                      | This work                                                |
| <b>Glucose</b>  | NiFeO <sub>x</sub> -NF             | 1.39                                          | 3.04                                                                      | Nat. Commun. 2020,<br>11, 265.                           |
|                 | Fe <sub>2</sub> P-films            | 1.58                                          | 3.46                                                                      | Electrochem. Commun.<br>2017, 83, 11-15.                 |
| <b>Urea</b>     | NiMoO-Ar                           | 1.55                                          | 3.39                                                                      | Energy Environ. Sci.<br>2018, 11, 1890-1897.             |
|                 | ONiMoP/NF                          | 1.68                                          | 3.68                                                                      | Adv. Funct. Mater.<br>2021, 2104951.                     |
|                 | Ni <sub>3</sub> N/NF               | 1.42                                          | 3.11                                                                      | ACS Appl. Mater.<br>Interfaces 2019, 11,<br>13168-13175. |
|                 | Ni <sub>2</sub> P/NF               | 1.5                                           | 3.28                                                                      | J. Mater. Chem. A<br>2017, 5, 3208-3213.                 |
| <b>HMF</b>      | Ni <sub>2</sub> S <sub>3</sub> /NF | 1.64                                          | 3.59                                                                      | J. Am. Chem. Soc.<br>2016, 138, 13639-<br>13646.         |
|                 | Ni <sub>3</sub> N@C                | 1.60                                          | 3.50                                                                      | Angew. Chem. Int. Ed.<br>2019, 131, 16042-<br>16050.     |
|                 | Ni <sub>2</sub> P                  | 1.62                                          | 3.54                                                                      | Angew. Chem. Int. Ed.<br>2016, 55, 9913-9917.            |
|                 | MoO <sub>2</sub> -FeP              | 1.66                                          | 3.63                                                                      | Adv. Mater. 2020, 32,<br>2000455.                        |
| <b>Alcohols</b> | NC/Ni-Mo-N                         | 1.60                                          | 3.50                                                                      | Appl. Catal. B 2021,<br>298, 120493.                     |
|                 | 3D porous Nickel                   | 1.66                                          | 3.63                                                                      | ACS Catal. 2017, 7,<br>4564-4570.                        |
|                 | Mo-Ni alloy NPs                    | 1.53                                          | 3.35                                                                      | J. Mater. Chem. A<br>2019, 7, 16501-16507.               |
|                 | Ni(OH) <sub>2</sub> /NF            | 1.66                                          | 3.63                                                                      | Appl. Catal. B 2021,<br>281, 119510.                     |

**Table S4.** Comparison of the required cell voltages of our CF@CoNC-2T at different current densities with various previously reported two-electrode organics-assisted electrocatalysis and overall water splitting H<sub>2</sub> production systems in 1M KOH solution.

| Substrate | Electrode materials                                                                 | Cell voltage / V           |                            |                            | References                                               |
|-----------|-------------------------------------------------------------------------------------|----------------------------|----------------------------|----------------------------|----------------------------------------------------------|
|           |                                                                                     | 10<br>mA cm <sup>-2</sup>  | 50<br>mA cm <sup>-2</sup>  | 100<br>mA cm <sup>-2</sup> |                                                          |
| Glucose   | CF@CoNC-2T (+)   <br>CF@CoNC-2T (-)                                                 | 0.66                       | 0.82                       | 0.9                        | This work                                                |
|           |                                                                                     | 1.56<br>(H <sub>2</sub> O) | 1.72<br>(H <sub>2</sub> O) | 1.78<br>(H <sub>2</sub> O) |                                                          |
|           | Fe <sub>2</sub> P/steel mesh (+)   <br>Pt/C (-)                                     | 1.22                       | 1.50                       | 1.58                       | Nat. Commun.<br>2020, 11, 265.                           |
|           | NiFeO <sub>x</sub> -NF (+)   <br>NiFeN <sub>x</sub> /NF (-)                         | 1.24                       | 1.32                       | 1.39                       | Electrochem.<br>Commun. 2017,<br>83, 11-15.              |
| Urea      | Ni <sub>2</sub> P/NF/CC (+)   <br>Ni <sub>2</sub> P/NF/CC (-)                       | 1.05                       | 1.35                       | 1.5                        | Energy Environ.<br>Sci. 2018, 11,<br>1890-1897.          |
|           | Ni <sub>3</sub> N/NF (+)   <br>Ni <sub>3</sub> N/NF (-)                             | 1.34                       | 1.38                       | 1.42                       | Adv. Funct. Mater.<br>2021, 2104951.                     |
|           | ONiMoP/NF (+)   <br>ONiMoP/NF (-)                                                   | 1.36                       | 1.55                       | 1.68                       | ACS Appl. Mater.<br>Interfaces 2019,<br>11, 13168-13175. |
|           | NiMoO-Ar (+)   <br>NiMoO-H <sub>2</sub> (-)                                         | 1.38                       | 1.48                       | 1.55                       | J. Mater. Chem. A<br>2017, 5, 3208-<br>3213.             |
| HMF       | Ni <sub>2</sub> P NPA/NF (+)   <br>Ni <sub>2</sub> P NPA/NF (-)                     | 1.44                       | 1.58                       | 1.62                       | J. Am. Chem. Soc.<br>2016, 138, 13639-<br>13646.         |
|           | Ni <sub>2</sub> S <sub>3</sub> /NF (+)   <br>Ni <sub>2</sub> S <sub>3</sub> /NF (-) | 1.46                       | 1.58                       | 1.64                       | Angew. Chem. Int.<br>Ed. 2019, 131,<br>16042-16050.      |
|           | Ni <sub>3</sub> N@C (+)   <br>Ni <sub>3</sub> N@C (-)                               | 1.46                       | 1.55                       | 1.60                       | Angew. Chem. Int.<br>Ed. 2016, 55,<br>9913-9917.         |
|           | MoO <sub>2</sub> -FeP (+)   <br>MoO <sub>2</sub> -FeP (-)                           | 1.48                       | 1.59                       | 1.66                       | Adv. Mater. 2020,<br>32, 2000455.                        |
| Alcohols  | NC/Ni-Mo-N (+)   <br>NC/Ni-Mo-N (-)                                                 | 1.38                       | 1.47                       | 1.60                       | Appl. Catal. B<br>2021, 298, 120493.                     |
|           | Mo-Ni alloy NPs (+)   <br>Mo-Ni alloy NPs (-)                                       | 1.38                       | 1.45                       | 1.53                       | ACS Catal. 2017,<br>7, 4564-4570.                        |
|           | 3D porous nickel (+)   <br>3D porous nickel (-)                                     | 1.50                       | 1.60                       | 1.66                       | J. Mater. Chem. A<br>2019, 7, 16501-<br>16507.           |
|           | Ni(OH) <sub>2</sub> /NF(+)   <br>Ni(OH) <sub>2</sub> /NF (-)                        | 1.52                       | 1.62                       | 1.66                       | Appl. Catal. B<br>2021, 281, 119510.                     |

|                  |                                                                                                                                                                                         |      |      |      |                                                        |
|------------------|-----------------------------------------------------------------------------------------------------------------------------------------------------------------------------------------|------|------|------|--------------------------------------------------------|
| H <sub>2</sub> O | Ni <sub>0.82</sub> Co <sub>0.18</sub> O@C/NF (+)   <br>Ni <sub>0.82</sub> Co <sub>0.18</sub> O@C/NF (-)                                                                                 | 1.42 | \    | \    | Appl. Catal. B<br>2019, 252, 214-<br>221.              |
|                  | RuO <sub>2</sub> /NiO/NF (+)   <br>RuO <sub>2</sub> /NiO/NF (-)                                                                                                                         | 1.50 | \    | \    | Small 2018, 14,<br>1704073.                            |
|                  | N-CDs/Ni <sub>3</sub> S <sub>2</sub> /NF (+)   <br>N-CDs/Ni <sub>3</sub> S <sub>2</sub> /NF (-)                                                                                         | 1.50 | \    | \    | Carbon 2018, 129,<br>335-341.                          |
|                  | CoO <sub>x</sub> @CN (+)   <br>CoO <sub>x</sub> @CN (-)                                                                                                                                 | 1.52 | \    | \    | J. Am. Chem. Soc.<br>2015, 137, 2688-<br>2694.         |
|                  | Ni <sub>x</sub> Co <sub>3-x</sub> S <sub>4</sub> /Ni <sub>3</sub> S <sub>2</sub> /NF (+)   <br>Ni <sub>x</sub> Co <sub>3-x</sub> S <sub>4</sub> /Ni <sub>3</sub> S <sub>2</sub> /NF (-) | 1.53 | 1.68 | 1.80 | Nano Energy 2017,<br>35, 161-170.                      |
|                  | FeB <sub>2</sub> NPs/NF (+)    FeB <sub>2</sub><br>NPs/NF (-)                                                                                                                           | 1.57 | \    | \    | Adv. Energy<br>Mater. 2017, 7,<br>1700513.             |
|                  | Ni <sub>0.51</sub> Co <sub>0.49</sub> P (+)   <br>Ni <sub>0.51</sub> Co <sub>0.49</sub> P (-)                                                                                           | 1.57 | \    | \    | Adv. Funct. Mater.<br>2016, 26, 7644-<br>7651.         |
|                  | NiFeSP/NF (+)   <br>NiFeSP/NF (-)                                                                                                                                                       | 1.58 | \    | \    | ACS Nano 2017,<br>11, 10303-10312.                     |
|                  | NiCoP/NF (+)   <br>NiCoP/NF (-)                                                                                                                                                         | 1.58 | \    | \    | Nano Lett. 2016,<br>16, 7718-7725.                     |
|                  | Ni <sub>2</sub> P-NF (+)   <br>Ni <sub>2</sub> P-NF (-)                                                                                                                                 | 1.58 | \    | \    | ACS Catal. 2017,<br>7, 103-109.                        |
|                  | NiCoP-NF (+)   <br>NiCoP-NF (-)                                                                                                                                                         | 1.58 | 1.82 | 1.98 | Nano Lett. 2016,<br>16, 7718-7725.                     |
|                  | NiCo <sub>2</sub> O <sub>4</sub> /Ni <sub>2</sub> P/NF (+)   <br>NiCo <sub>2</sub> O <sub>4</sub> /Ni <sub>2</sub> P/NF (-)                                                             | 1.59 | \    | \    | Adv. Mater.<br>Interfaces 2017, 4,<br>1700481.         |
|                  | VOOH (+)   <br>VOOH (-)                                                                                                                                                                 | 1.62 | \    | \    | Angew. Chem. Int.<br>Ed. 2017, 129,<br>588-592.        |
|                  | Co <sub>5.47</sub> N NP@N-PC (+)   <br>Co <sub>5.47</sub> N NP@N-PC (-)                                                                                                                 | 1.62 | \    | \    | ACS Appl. Mater.<br>Interfaces 2018,<br>10, 7134-7144. |
|                  | CoP-MNA (+)   <br>CoP-MNA (-)                                                                                                                                                           | 1.62 | \    | \    | Adv. Funct. Mater.<br>2015, 25, 7337-<br>7347.         |
|                  | Co <sub>3</sub> O <sub>4</sub> -MTA (+)   <br>Co <sub>3</sub> O <sub>4</sub> -MTA (-)                                                                                                   | 1.63 | \    | \    | Angew. Chem. Int.<br>Ed. 2017, 56, 588-<br>592.        |
|                  | NC-CNT/CoP/CC (+)    NC-<br>CNT/CoP/CC (-)                                                                                                                                              | 1.63 | \    | \    | J. Mater. Chem. A<br>2018, 6, 9009-<br>9018.           |
|                  | Hollow Co <sub>3</sub> O <sub>4</sub> /NF (+)   <br>Hollow Co <sub>3</sub> O <sub>4</sub> /NF (-)                                                                                       | 1.63 | \    | \    | Angew. Chem. Int.<br>Ed. 2016, 56,<br>1324-1328.       |
|                  | CoSe <sub>2</sub> -CC (+)   <br>CoSe <sub>2</sub> -CC (-)                                                                                                                               | 1.63 | \    | \    | Adv. Mater. 2016,<br>28, 7527-7532.                    |
|                  | NiCo <sub>2</sub> S <sub>4</sub> -NF (+)                                                                                                                                                | 1.63 | \    | \    | Adv. Funct. Mater.                                     |

|                  |                                                                                                   |      |      |                                              |
|------------------|---------------------------------------------------------------------------------------------------|------|------|----------------------------------------------|
|                  | NiCo <sub>2</sub> S <sub>4</sub> -NF (-)                                                          |      |      | 2016, 26, 4661-4672.                         |
|                  | NiSe-NF (+)   <br>NiSe-NF (-)                                                                     | 1.63 | \    | Angew. Chem. Int. Ed. 2015, 54, 9483-9487.   |
|                  | CP@Ni-P (+)   <br>CP@Ni-P (-)                                                                     | 1.63 | \    | Adv. Funct. Mater. 2016, 26, 4067-4077.      |
|                  | Ni <sub>12</sub> P <sub>5</sub> /NF (+)   <br>Ni <sub>12</sub> P <sub>5</sub> /NF (-)             | 1.64 | \    | ACS Catal. 2017, 7, 103-109.                 |
|                  | CoFe/NF (+)   <br>CoFe/NF (-)                                                                     | 1.64 | \    | Small 2018, 14, 1702568.                     |
|                  | NiCo <sub>2</sub> O <sub>4</sub> (+)   <br>NiCo <sub>2</sub> O <sub>4</sub> (-)                   | 1.65 | \    | Angew. Chem. Int. Ed. 2016, 55, 1324-1328.   |
|                  | NiCo/NiCoO <sub>x</sub> @FeOOH (+)<br>   NiCo/NiCoO <sub>x</sub> @FeOOH (-)                       | 1.65 | \    | Electrochim. Acta 2017, 257, 1-8.            |
|                  | NiCo-LDH/NF (+)   <br>NiCo-LDH/NF (-)                                                             | 1.66 | \    | Dalton Trans. 2017, 46, 8372-8376.           |
|                  | NiFe/NiCo <sub>2</sub> O <sub>4</sub> /Ni (+)   <br>NiFe/NiCo <sub>2</sub> O <sub>4</sub> /Ni (-) | 1.67 | \    | Adv. Funct. Mater. 2016, 26, 3515-3523.      |
| H <sub>2</sub> O | NiFe-OH-PO <sub>4</sub> /NF (+)   <br>NiFe-OH-PO <sub>4</sub> /NF (-)                             | 1.68 | 1.91 | ACS Appl. Mater. Interfaces 2017, 9, 35837.  |
|                  | FeCoNi-CC (+)   <br>FeCoNi-CC (-)                                                                 | 1.68 | \    | ACS Catal. 2017, 7, 469-479.                 |
|                  | Fe-Co films (+)   <br>Fe-Co films (-)                                                             | 1.68 | \    | Nano Energy 2017, 38, 576-584.               |
|                  | Co <sub>1</sub> Mo <sub>1</sub> CH/NF (+)   <br>Co <sub>1</sub> Mo <sub>1</sub> CH/NF (-)         | 1.68 | \    | J. Am. Chem. Soc. 2017, 139, 8320-8328.      |
|                  | Ni <sub>5</sub> P <sub>4</sub> (+)    Ni <sub>5</sub> P <sub>4</sub> (-)                          | 1.70 | \    | Angew. Chem. Int. Ed. 2015, 54, 12361-12365. |
|                  | NiFe LDH-NF (+)   <br>NiFe LDH-NF (-)                                                             | 1.70 | \    | Science 2014, 345, 1593-1596.                |
|                  | CP/CTs/Co-S (+)   <br>CP/CTs/Co-S (-)                                                             | 1.73 | \    | ACS Nano 2016, 10, 2342-2348.                |
|                  | CP-CTs-Co-S (+)   <br>CP-CTs-Co-S (-)                                                             | 1.74 | \    | ACS. Nano 2016, 10, 2342-2348.               |
|                  | Co <sub>2</sub> B-500-NG (+)   <br>Co <sub>2</sub> B-500-NG (-)                                   | 1.81 | \    | Adv. Energy Mater. 2016, 6, 1502313.         |
